1  
2  
3  
4  
5  
6  
7  
8  
9  
10  
11  
12  
13  
14  
15  
16  
17  
18  
19  
20  
21  
22  
23  
24  
25  
26  
27  
28  
29  
30

**Genetic dissection of Down syndrome-associated alterations in APP/amyloid- $\beta$  biology using mouse models**

Justin L. Tosh<sup>1,2</sup>, Ellie Rhymes<sup>1</sup>, Paige Mumford<sup>3</sup>, Heather T. Whittaker<sup>1</sup>, Laura J. Pulford<sup>1</sup>, Sue J. Noy<sup>1,4</sup>, Karen Cleverley<sup>1,4</sup>, Matthew C. Walker<sup>5</sup>, Victor L.J. Tybulewicz<sup>2,4,6</sup>, Rob C. Wykes<sup>5</sup>, Elizabeth M.C Fisher<sup>1,4¶</sup>, Frances K. Wiseman<sup>3,4¶</sup>

¶Corresponding authors.  
Email: [Elizabeth.fisher@ucl.ac.uk](mailto:Elizabeth.fisher@ucl.ac.uk) (E.M.C.F.) or [F.wiseman@ucl.ac.uk](mailto:F.wiseman@ucl.ac.uk) (F.K.W.)

- 1 Department of Neuromuscular Diseases, Queen Square Institute of Neurology, University College London, Queen Square, London WC1N 3BG, UK.
- 2 The Francis Crick Institute, London NW1 1AT, UK.
- 3 The UK Dementia Research Institute, University College London, Queen Square, London WC1N 3BG, UK.
- 4 LonDownS: London Down syndrome consortium ([www.ucl.ac.uk/london-down-syndrome-consortium](http://www.ucl.ac.uk/london-down-syndrome-consortium))
- 5 Department of Clinical and Experimental Epilepsy, Institute of Neurology, University College London, Queen Square, London WC1N 3BG, UK.
- 6 Department of Immunology and Inflammation, Imperial College, London W12 0NN, UK.

31

32 **Abstract**

33

34 **Individuals who have Down syndrome (caused by trisomy of chromosome 21), have a**  
35 **greatly elevated risk of early-onset Alzheimer's disease, in which amyloid- $\beta$**   
36 **accumulates in the brain. Amyloid- $\beta$  is a product of the chromosome 21 gene *APP***  
37 **(amyloid precursor protein) and the extra copy or 'dose' of *APP* is thought to be the**  
38 **cause of this early-onset Alzheimer's disease. However, other chromosome 21 genes**  
39 **likely modulate disease when in three-copies in people with Down syndrome. Here we**  
40 **show that an extra copy of chromosome 21 genes, other than *APP*, influences *APP/A $\beta$***   
41 **biology. We crossed Down syndrome mouse models with partial trisomies, to an *APP***  
42 **transgenic model and found that extra copies of subgroups of chromosome 21 gene(s)**  
43 **modulate amyloid- $\beta$  aggregation and *APP* transgene-associated mortality,**  
44 **independently of changing amyloid precursor protein abundance. Thus, genes on**  
45 **chromosome 21, other than *APP*, likely modulate Alzheimer's disease in people who**  
46 **have Down syndrome.**

47

48

## 49 INTRODUCTION

50 Down syndrome (DS), which occurs in approximately 1 in 1000 births, is the most common  
51 cause of early-onset Alzheimer's disease-dementia (AD-DS) (1). Approximately 6 million  
52 people have DS world-wide and by the age of 65 two-thirds of these individuals will have a  
53 clinical dementia diagnosis. Moreover, approaching 100% of women with DS will have a  
54 dementia diagnosis by the age of 80 (2) and dementia is now a leading cause of death for  
55 people who have DS in the UK (3). Trisomy of human chromosome 21 (Hsa21) and the  
56 resulting abnormal gene dosage also significantly affect neurodevelopment, neuronal function  
57 and other aspects of physiology, such as cardiovascular and immune systems, giving rise to  
58 the spectrum of features seen in DS (4).

59

60 Clinical-genetic studies demonstrate that the Hsa21 gene amyloid precursor protein (*APP*) is  
61 central to early AD onset in people with DS (5, 6), but other genes, including some found on  
62 Hsa21, modulate age of dementia onset (7–9). *APP* undergoes enzymatic cleavage within  
63 the brain to form numerous fragments, including amyloid- $\beta$  which accumulates in AD-  
64 associated amyloid plaques, and C-terminal fragments (CTF) that may impair intracellular  
65 processes (10). However, how trisomy of Hsa21 genes, other than *APP*, impacts *APP* biology  
66 and subsequent neurodegeneration and dementia is not well understood (1).

67

68 Individual DS phenotypes likely arise from an extra copy of specific genes on Hsa21, which is  
69 currently estimated to carry 234 protein-coding genes (11). While not all Hsa21 genes are  
70 'dosage-sensitive', the increased dosage of some genes may lead to increased transcript and  
71 protein levels that result in biologically relevant molecular and cellular changes. Identification  
72 of the Hsa21 genes that affect AD-dementia development will further understanding of AD-DS  
73 mechanisms and may also provide novel insight into neurodegeneration in the euploid  
74 population by the identification of key pathways. Moreover, understanding the development of  
75 AD-DS is of critical importance for the translation of AD prevention therapies for people with  
76 DS.

77

78 In a previous study we crossed a mouse model of DS (the Tc1 mouse) that does not have an  
79 additional copy of *APP* to a transgenic mouse overexpressing *APP* with AD-causing mutations  
80 ('J20' mice). This work demonstrated that an additional copy of Hsa21, independent of an  
81 extra copy of *APP*, exacerbated amyloid- $\beta$  aggregation and deposition, enhanced *APP*  
82 transgene-associated mortality, altered behaviour and reduced cognitive performance in  
83 double mutant progeny that model AD-DS (12). In the same system we also observed that  
84 an additional copy of Hsa21, independently of an extra copy of *APP*, increased *APP*-CTF  
85 fragments in male but not female brains in AD-DS mice.

86

87 Here using independent DS mouse models (13, 14) we investigated these phenotypes further  
88 and determined that a causal gene(s) for elevated amyloid- $\beta$  aggregation lies between *Mir802*  
89 and *Zbtb21* (within the 'Dp(16)3Tyb' mouse duplication). We also found that a dosage  
90 sensitive gene(s) that enhances *APP* transgene-associated mortality is located between  
91 *Mis18a* and *Runx1* (within the 'Dp(16)2Tyb' mouse duplication) and that dosage-sensitive  
92 genes that protect against *APP* transgene-associated mortality are located between *Mir802*  
93 and *Zbtb21* (Dp(16)3Tyb duplication), *Prmt2* and *Pdxk* (Dp(17)1Yey duplication) and also  
94 between *Abcg1* and *Rrp1b* (Dp(10)1Yey duplication). We went on to show that the rescue of  
95 mortality by the Dp(10)1Yey duplication occurred independently of changes to the frequency  
96 or duration of *APP* transgene-associated seizures.

97

98 These data show that an extra copy of multiple chromosome 21 gene orthologues modulate  
99 multiple AD-related phenotypes in mouse models. Similar mechanisms may also occur in  
100 people who have DS when they develop AD-dementia and may contribute to the AD-clinical  
101 differences that occur within this population.

102

103

## 104 **RESULTS**

### 105 **Survival of tgAPP mouse is modulated by additional copies of chromosome 21 mouse** 106 **homologues**

107 To determine whether an additional copy of chromosome 21 genes other than *APP* modified  
108 *APP*/amyloid- $\beta$  biology we crossed the J20 *APP* transgenic (tgAPP) mouse model, which  
109 expresses human *APP* with AD-associated point mutations, with a panel of mouse models of  
110 DS (**Fig.1A**). These DS mouse models have segmental duplications of defined regions of the  
111 mouse genome that are syntenic with Hsa21. Hsa21 has homology to three regions of the  
112 mouse genome, within mouse chromosomes 10, 16 and 17 (Mmu10, Mmu16, Mmu17). Each  
113 model has an extra copy of a subset of Hsa21-orthologous genes and can be used to  
114 determine which Hsa21 genes cause DS-associated phenotypes (13, 15). We systematically  
115 assessed crosses of these DS models with the J20 tgAPP mouse to determine how each  
116 segmental duplication affected tgAPP-associated phenotypes. Mice with the tgAPP transgene  
117 and a segmental duplication were compared to littermates that only carried tgAPP to assess  
118 the effect of the segmental duplication on *APP*/ $A\beta$  biology (**Fig. 1B**).

119

120 *APP* transgenic mice often exhibit elevated mortality, likely because of the epileptogenic effect  
121 of *APP* or an *APP* cleavage product (16). We determined whether mortality in our J20 tgAPP  
122 progeny was modulated by the extra copy of Hsa21 mouse homologues in the DS mouse

123 mapping panel (**Fig. 2**), because we had determined previously that trisomy of human  
124 chromosome 21 elevated tgAPP-associated mortality in another mouse cross (12). We found  
125 an additional copy of a gene(s) between *Mis18a* and *Runx1* (Dp(16)2Tyb segmental  
126 duplication on Mmu16) significantly reduced survival associated with J20 tgAPP prior to 6-  
127 months of age (**Fig. 2A**). Thus, for animal welfare we ceased this experimental cross and only  
128 a 6-month of age time-point was produced, and we did not investigate phenotypes in older  
129 animals.

130

131 Conversely an additional copy of the regions between *Mir802* and *Zbtb21* (Dp(16)3Tyb  
132 duplication on Mmu16) (**Fig. 2B**), *Prmt2* and *Pdxk* (Dp(10)1Yey duplication on Mmu10) (**Fig.**  
133 **2C**) and *Abcg1* and *Rrp1b* (Dp(17)1Yey duplication on Mmu17) (**Fig. 2D**) all partially rescued  
134 J20 tgAPP-associated reduced survival.

135

136 These data suggest that an additional copy of at least four genes on Hsa21 modulates tgAPP-  
137 related mortality. Moreover, that an extra copy of genes on Hsa21 both exacerbate and  
138 alleviate tgAPP-associated mortality. This may be the result of suppression of tgAPP-  
139 associated seizures which are thought to be the major cause of elevated mortality in the J20  
140 mouse model. Alternatively, seizures may still occur but the mice may be protected from post-  
141 seizure mortality. Seizure occurrence is linked to the abundance of APP and its cleavage  
142 fragments (16, 17), thus changes to mortality may result from alterations in these proteins.  
143 Thus, we next tested these potential mechanisms.

144

145

#### 146 **Segmental duplications do not alter FL-APP abundance but the Dp(16)3Tyb duplication** 147 **causes an increase in cortical $\alpha$ -CTF**

148 The observed alteration in tgAPP-associated mortality may result from changes to the  
149 abundance of full-length APP (FL-APP) or one of its cleavage fragments (16, 18, 19). Thus,  
150 we investigated the abundance of full-length APP (FL-APP) in the progeny of a cross of  
151 Dp(16)3Tyb, Dp(10)1Yey or Dp(17)1Yey duplications with tgAPP J20 mice at 3-months of  
152 age. We found no evidence that abundance of FL-APP (**Fig. S1A**) was altered by an additional  
153 copy of the Dp(16)3Tyb, Dp(17)1Yey or Dp(10)1Yey regions, in the cortex. We were not able  
154 to investigate the effect of the Dp(16)2Tyb region *in vivo* on FL-APP abundance because the  
155 elevated mortality observed in the intercross prevented the ethical generation of tissue  
156 samples for these experiments.

157

158 Using an alternative mouse model of DS (the 'Tc1' mouse) we have previously shown that an  
159 extra copy of Hsa21 raises the abundance of alpha and beta C-terminal fragments of APP ( $\alpha$ -

160 CTF and  $\beta$ -CTF) in the brain of male mice (12). Here we show that an additional copy of a  
161 gene(s) between *Mir802* and *Zbtb21* (Dp(16)3Tyb segmental duplication) is sufficient to raise  
162 the level of  $\alpha$ -CTF in the cortex in male and female mice (**Fig. 3A**). No significant changes in  
163  $\beta$ -CTF levels were detected in the presence of the Dp(16)3Tyb duplication (**Fig. 3A**).  $\alpha$ -CTF  
164 and  $\beta$ -CTF levels were not altered in the Dp(10)1Yey or Dp(17)1Yey duplication models (**Fig.**  
165 **3B, C**). We were not able to investigate the effect of the Dp(16)2Tyb region *in vivo* on  $\alpha$ -CTF  
166 and  $\beta$ -CTF abundance because the elevated mortality observed in the intercross prevented  
167 the ethical generation of tissue samples for these experiments.

168  
169 To further investigate the effect of the Dp(16)3Tyb duplication on  $\alpha$ -CTF and  $\beta$ -CTF  
170 abundance we measured levels in the hippocampus at 3-months of age; no change in FL-  
171 APP,  $\alpha$ -CTF or  $\beta$ -CTF was observed (**Fig. S2**). Therefore, the rescue of tgAPP-associated  
172 mortality in the Dp(16)3Tyb and Dp(10)1Yey mouse models of DS occurs independently of a  
173 change in FL-APP or  $\beta$ -CTF in two key brain regions in the J20 tgAPP model. Moreover, the  
174 increase in  $\alpha$ -CTF abundance in the Dp(16)3Tyb segmental duplication model is brain region-  
175 dependent but sex-independent in contrast to our previous work in the Tc1 DS model.

176  
177 **Additional copies of Hsa21 homologues modulate aggregation of amyloid- $\beta$  in the brain**

178 Raised amyloid- $\beta$  may cause excitotoxicity and seizure related mortality (18). Moreover, our  
179 previous study using the Tc1 mouse model of trisomy of chromosome 21 demonstrated that  
180 aggregation of amyloid- $\beta_{42}$  is increased by the additional chromosome, independently of an  
181 additional copy of *APP*. Thus, we determined if an additional copy of the mouse Hsa21  
182 orthologues altered amyloid- $\beta$  biology. We fractionated soluble and insoluble (aggregated)  
183 cortical proteins and quantified levels of amyloid- $\beta_{40}$  and amyloid- $\beta_{42}$ .

184  
185 The abundance of insoluble amyloid- $\beta_{42}$  in the cortex was decreased in Dp(16)2Tyb;tgAPP  
186 mice compared to tgAPP littermates at 6-months of age in both males and females (**Fig. 4A**).  
187 However, given the high mortality of tgAPP;Dp(16)2Tyb mice, the reduction in amyloid- $\beta_{42}$   
188 may be a result of a “survivor effect” where in the presence of Dp(16)2Tyb duplication, only  
189 mice that had low APP/amyloid- $\beta_{42}$  may be able to survive to 6-months of age. Further  
190 experiments in an alternative model system are required to investigate this finding.

191  
192 Significantly elevated levels of insoluble amyloid- $\beta_{42}$  were observed in the Dp(16)3Tyb;tgAPP  
193 mice at 12-months of age in the cortex, compared to tgAPP littermates (**Fig. 4B**). However, at  
194 6-months of age although a small increase in insoluble amyloid- $\beta_{42}$  was observed this was not  
195 statistically significant (**Fig. S3**). An additional copy of the Dp(10)1Yey or Dp(17)1Yey  
196 duplications did not alter insoluble amyloid- $\beta_{42}$  abundance (**Fig. 4 C, D**).

197

198 The increased survival of Dp(16)3Tyb;tgAPP mice compared to tgAPP littermates could  
199 contribute to this change in phenotype, because Dp(16)3Tyb;tgAPP mice may be able to  
200 tolerate a higher APP/amyloid- $\beta_{42}$  load than tgAPP littermates, without ill effects. Thus to  
201 further assess whether the Dp(16)3Tyb duplication increased amyloid- $\beta$  aggregation, the  
202 abundance of multimeric amyloid- $\beta$  was measured by ELISA in cortex of Dp(16)3Tyb;tgAPP  
203 mice and tgAPP littermates at 3 months of age. This time-point is prior to the timing of  
204 significant mortality of tgAPP littermates and thus should control for the increased survival of  
205 Dp(16)3Tyb;tgAPP mice. Significantly more multimeric amyloid- $\beta$  was detected in  
206 Dp(16)3Tyb;tgAPP mice than tgAPP littermates (**Fig. 4E**). Thus an additional copy of a  
207 gene(s) located between *Mir802* and *Zbtb21* promotes amyloid- $\beta$  aggregation in the brain in  
208 both young and old mice.

209

210 An additional copy of Hsa-21 homologues from the Dp(16)2Tyb, Dp(16)3Tyb or Dp(17)1Yey  
211 regions did not significantly alter the abundance of insoluble amyloid- $\beta_{40}$ , soluble amyloid- $\beta_{40}$   
212 or soluble amyloid- $\beta_{42}$  (**Fig. S4, S5 A, B, D**). Thus the increase in insoluble amyloid- $\beta_{42}$   
213 abundance caused by the extra copy of the Dp(16)3Tyb duplication likely occurs because of  
214 enhanced amyloid- $\beta_{42}$  aggregation or impaired clearance. An additional copy of the  
215 Dp(10)1Yey region led to an increase in Tris soluble amyloid- $\beta_{42}$  at 12 months of age but this  
216 was not seen at 6 months of age (**Fig. S5 C**). The Dp(10)1Yey region did not alter the  
217 abundance of insoluble or soluble amyloid- $\beta_{40}$  at either time-point.

218

219

## 220 **Additional copies of Hsa21 homologues do not modulate deposition of amyloid- $\beta$ in the** 221 **brain**

222 To determine if the changes in amyloid- $\beta_{42}$  aggregation in the Dp(16)2Tyb-tgAPP and  
223 Dp(16)3Tyb-tgAPP models also affected deposition of the peptide we undertook histological  
224 studies of brain at 6- and 12-months of age.

225

226 A non-significant trend for decreased amyloid- $\beta$  deposition was observed in the hippocampus  
227 at 6- and 12-months of age in the presence of the Dp(16)2Tyb duplication (**Fig. 5A, E**). This  
228 small decrease in amyloid- $\beta$  deposition in the Dp(16)2Tyb;tgAPP mice is consistent with the  
229 decrease in aggregated amyloid- $\beta_{42}$  detected by biochemistry. The high mortality of  
230 Dp(16)2Tyb;tgAPP mice meant too few animals survived for a sufficiently powered  
231 biochemical study of the solubility/aggregation on amyloid- $\beta$ . We note that phenotypes in this  
232 cross may be the results of a survivor effect.

233

234 No change in amyloid- $\beta$  deposition in the hippocampus was observed in Dp(16)3Tyb;tgAPP,  
235 Dp(10)1Yey;tgAPP and Dp(17)1Yey;tgAPP mice compared with tgAPP littermates at either  
236 time-point (**Fig. 5 B, C, D, F, G, H**). Similarly, no significant changes in deposition of amyloid-  
237  $\beta$  in the cortex was observed at 6-months or 12-months of age in the Dp(16)3Tyb;tgAPP,  
238 Dp(10)1Yey;tgAPP or Dp(17)1Yey;tgAPP compared to tgAPP littermates (**Fig. S6**). Thus  
239 increased amyloid- $\beta_{42}$  aggregation caused by Dp(16)3Tyb does not result in a robust increase  
240 in deposition of amyloid within the brain and the Dp(10)1Yey and Dp(17)1Yey duplications are  
241 not sufficient to modulate amyloid- $\beta$  accumulation.

242

243

### 244 **The rescue of APP transgene-associated mortality by segmental duplication of *Prmt2*** 245 **and *Pdxk* is not caused by a suppression of seizures**

246

247 Elevated mortality in *APP* transgenic mice such as the J20 animals studied here is likely  
248 caused by the occurrence of seizures and raised subclinical seizure activity in this  
249 overexpression model. The *Prmt2* and *Pdxk* region which is duplicated in the Dp(10)1Yey  
250 mouse model of DS carries *Cstb*, which encodes the enzyme cystatin B. Loss of function of  
251 this gene causes elevated seizure activity (20). Thus an additional copy of this gene may  
252 decrease the occurrence of tgAPP-associated seizures in the Dp(10)1Yey model and this may  
253 underlie the rescue of mortality in Dp(10)1Yey;tgAPP mice. To test this hypothesis, we  
254 measured the occurrence of seizures in tgAPP and Dp(10)1Yey;tgAPP male mice at 3-4  
255 months of age. The frequency and duration of seizures associated with the *APP* transgene  
256 was not altered by the Dp(10)1Yey region (**Fig. 6**). Thus the rescue of mortality in  
257 Dp(10)1Yey;tgAPP double mutant mice is downstream or independent of seizure occurrence.  
258 This suggests that 3 copies of *Cstb* do not modify tgAPP seizure occurrence, consistent with  
259 a previous report that showed an increase in *Cstb* copy number does not alter picrotoxin-  
260 induced seizure thresholds (21).

261

262

263

264

265

## 266 **DISCUSSION**

267

268 People who have DS are highly prone to develop early-onset dementia caused by AD (2).  
269 Here we have used mouse models of DS and tgAPP mouse models of amyloid- $\beta$  deposition  
270 to understand how sub-regions of Hsa21 modulate AD-related biology. Our data suggest that



271 gene(s) from multiple regions of the chromosome affect APP/amyloid- $\beta$  associated mortality,  
272 amyloid- $\beta$  aggregation and deposition, independently of changes in FL-APP abundance.  
273 Moreover, we show that changes in mortality occur independently of an alteration in seizure  
274 duration or frequency in the Dp(10)1Yey segmental duplication model, despite this model  
275 having 3 copies of epilepsy related gene *Cstb*.

276

277 Mouse models are tools to understand the human condition, and within all model systems lie  
278 limitations. In this study we have modelled human trisomy by duplication of mouse  
279 orthologues. Thus, human genes/isoforms without a mouse equivalent have not been studied.  
280 We have determined how an additional copy of sub-groups of mouse Hsa21 orthologues affect  
281 biology but we have not determined how these groups of genes may interact with each other.  
282 Thus, some of the gene-interactions that occur in people who have DS are not modelled here.  
283 Also, we have not studied the effect of an extra copy of the 45 genes on Hsa21 located near  
284 to *App* on APP/amyloid- $\beta$  biology due to the potential confounding effect of increased copy  
285 number of endogenous mouse *App*. Additionally, we used an over-expressing APP transgenic  
286 model which has high/non-physiological levels of APP and its cleavage fragments, thus  
287 modifying effects of some Hsa21-dosage sensitive genes may be masked.

288

289 In our previous study crossing an alternative mouse model of DS (Tc1 mouse) with the J20  
290 tgAPP mouse we found a robust increase in both the aggregation and deposition of amyloid-  
291  $\beta$  in the cortex and hippocampus (12). In this study we identified a subregion of Hsa21 that is  
292 sufficient to cause an increase in the aggregation but not in deposition of amyloid- $\beta$ .  
293 Additionally this increase was not as large as observed in the Tc1;tgAPP mice. Our data  
294 suggest that either a human specific gene/isoform, a gene(s) located close to *App*, or a  
295 combination of multiple genes across the chromosome is required to robustly increase both  
296 aggregation and deposition of amyloid- $\beta$  reported in our previous model system. Some DS-  
297 associated phenotypes result from the combined effect of an extra copy of multiple genes on  
298 chromosome 21 (13, 22). This may occur via the effect of mass-action of an extra copy of  
299 many genes, perhaps via a global impairment in proteostasis as has been recently suggested  
300 to occur in DS (23). Further work is required to investigate the effect of this mechanism and  
301 how an extra copy of the genes located near to *App* effect APP/amyloid- $\beta$  biology.

302

303 Moreover, we observe a significant decrease in aggregation, and non-significant trend for  
304 decreased deposition, of amyloid- $\beta$  caused by an additional copy of the Dp(16)2Tyb region.  
305 We note the Tc1 mouse model does not have an additional copy of the genes duplicated in  
306 the Dp(16)2Tyb model, which likely underlies some of the phenotypic differences between  
307 these two inter-crosses. All phenotypes observed in the Dp(16)2Tyb cross may be the result

308 of survivor effect because of the highly elevated mortality of the Dp(16)2Tyb;tgAPP mice.  
309 Further work in an alternative model system is required to investigate how the Dp(16)2Tyb  
310 region modulates aggregation and deposition of amyloid- $\beta$ .

311

312 Mortality in APP transgenic mouse models including the J20 line is caused by seizures (16),  
313 likely by a process similar to Sudden Unexpected Death in Epilepsy (SUDEP). SUDEP is  
314 thought to occur because of a post-seizure response which slows electrical activity in the  
315 brain-stem leading to a fatal suppression of respiratory and cardiac output (24, 25). Here we  
316 show that tgAPP associated mortality is rescued by an extra copy of multiple regions of Hsa21,  
317 and in Dp(10)1Yey mice this occurs despite the frequent occurrence of seizure activity. This  
318 suggests that an increase in copy number of a gene(s) in this region of Hsa21 may protect  
319 against SUDEP. Similarly, copy number of genes in the Dp(16)2Tyb region may worsen the  
320 incidence, duration or adverse outcome of seizures. Further research will determine the  
321 mechanism of action of this region and whether genes in this region contribute to the increased  
322 incidence of epilepsy and dementia-associated seizures in people who have DS.

323

324 In conclusion, an additional copy of genes on Hsa21 other than *App* modulate APP/amyloid-  
325  $\beta$  biology, including tgAPP associated mortality and amyloid- $\beta$  aggregation in a transgenic  
326 mouse model. Thus, genes on Hsa21 other than *APP* may influence the development and  
327 progression of AD in people who have DS, and AD therapies for this important group of  
328 individuals must be carefully selected to take this into account. Lastly, our data is consistent  
329 with DS-associated phenotypes being the result of human-specific gene effects or the  
330 interaction of an extra copy of multiple genes on Hsa21.

331

332

333

## 334 **MATERIALS AND METHODS**

### 335 **Animal welfare and husbandry**

336

337 Mice were housed in individually ventilated cages (Techniplast) with grade 5, autoclaved dust-  
338 free wood bedding, paper bedding and a translucent red “mouse house”. Free-access to food  
339 and water was provided. The animal facility was maintained at a constant temperature of 19-  
340 23°C with 55 ± 10% humidity in a 12 h light/dark cycle. Pups were weaned at 21 days and  
341 moved to standardised same-sex group housing with a maximum of 5 mice per cage.

342 The following mouse strains were used in this paper, here we show abbreviated name and  
343 then the official name and unique Mouse Genome Informatics (MGI) identifier: Dp(16)2Tyb  
344 (Dp(16Mis18a-Runx1)2TybEmcf, MGI:5703800), Dp(16)3Tyb (Dp(16Mir802-  
345 Zbtb21)3TybEmcf, MGI:5703802), Dp(10)1Yey (Dp(10Prmt2-Pdxk)2Yey, MGI:4461400) and  
346 Dp(17)1Yey (Dp(17Abcg1-Rrp1b)3Yey, MGI:4461398).

347 Mice were maintained by backcrossing males and females to C57BL/6J mice. tgAPP mice  
348 (B6.Cg-Tg(PDGFB-APPSwInd)20Lms, MGI:3057148) were maintained by mating tgAPP  
349 female mice to C57BL/6J male mice. Experimental cohorts were generated by crossing male  
350 or female mice carrying Hsa21 orthologous duplications with male or female tgAPP mice.

351 Animals were euthanized by exposure to rising carbon dioxide, followed by confirmation of  
352 death by dislocation of the neck in accordance with the Animals (Scientific Procedures) Act  
353 1986 (United Kingdom).

354

### 355 **Tissue preparation and western blotting**

356

357 For analysis of protein abundance in hippocampus and cortex, tissue was dissected under ice  
358 cold PBS before snap freezing. Samples were then homogenised in RIPA Buffer (150 mM  
359 sodium chloride, 50 mM Tris, 1 % NP-40, 0.5 % sodium deoxycholate, 0.1 % sodium dodecyl  
360 sulfate) plus complete protease inhibitors (Calbiochem) by mechanical disruption. Total  
361 protein content was determined by Bradford assay or Pierce™ 660nm assay (ThermoFisher).  
362 Samples from individual animals were run separately and were not pooled.

363

364 Equal amounts of total brain proteins were then denatured in LDS denaturing buffer  
365 (Invitrogen) and β-mercaptoethanol, prior to separation by SDS-PAGE gel electrophoresis  
366 using precast 4-12 % Bis-Tris gels (Invitrogen). Proteins were transferred to nitrocellulose or  
367 PVDF membranes prior to blocking in 5 % milk/PBST (0.05 % Tween-20) or 5-10 % bovine  
368 serum albumin (BSA)/PBST. Primary antibodies were diluted in 1 % BSA/PBST, HRP-

369 conjugated secondary anti-rabbit, anti-mouse and anti-goat antibodies (Dako) were diluted  
370 1:10,000 in 1% BSA/PBST. Linearity of antibody binding was confirmed by a 2-fold dilution  
371 series of cortical protein samples. Band density was analysed using Image J. Relative signal  
372 of the antibody of interest compared to the internal loading control was then calculated, and  
373 relative signal was then normalized to mean relative signal of control samples run on the same  
374 gel. Mean of technical replicates were calculated and used for ANOVA, such that biological  
375 replicates were used as the experimental unit.

376

377 Primary antibodies against C-terminal APP (Sigma A8717, 1:10,000),  $\beta$ -actin (Sigma A5441,  
378 1:60,000), and GAPDH (Sigma G9545, 1:200,000), were used.

379

### 380 **Biochemical fractionation of mouse brain tissues**

381

382 Cortical proteins were fractionated as described in Shankar *et al.* (2009). A half cortex was  
383 weighed on a microscale and homogenised in 4 volumes of ice-cold Tris-buffered saline (TBS)  
384 (50mM Tris-HCl pH 8.0) containing a cocktail of protease and phosphatase inhibitors  
385 (Calbiochem) using a handheld mechanical homogeniser and disposable pestles (Anachem).  
386 Samples were then transferred to 1.5ml microfuge tubes (Beckman Coulter #357448),  
387 balanced by adding more TBS and centrifuged at  $175,000 \times g$  with a RC-M120EX  
388 ultracentrifuge (Sorvall) fitted with rotor S100AT5 at 4 °C for 30 mins. Supernatant (the Tris-  
389 soluble fraction) was removed and stored at -80 °C. The remaining pellet was homogenised  
390 in 5 volumes of ice-cold 1 % Triton-X (Sigma-Aldrich) in TBS (50mM Tris-HCl pH 8.0),  
391 balanced and centrifuged at 175,000g for 30 mins at 4 °C. The resultant supernatant (the  
392 Triton-soluble fraction) was removed and stored at -80 °C. The pellet was then re-suspended  
393 in 8 volumes (by original cortical weight) in TBS (50mM Tris-HCl pH 8.0), containing 5M  
394 Guanidine HCl and left overnight at 4 °C on a rocker to ensure full re-suspension, and  
395 subsequently stored at -80 °C. A 660 nm protein assay (ThermoFisher) was performed to  
396 determine protein concentration for normalisation following ELISA assay. For 3-month old  
397 animals, hippocampal TBS-soluble protein fractions were prepared according to Hölttä *et al.*  
398 (2013). Total mouse hippocampus from the left hemisphere was homogenised using a  
399 mechanical homogeniser and disposable pestles (Anachem) in 100 $\mu$ l TBS (50mM Tris-HCl  
400 pH 8.0) containing protease and phosphatase inhibitors (Calbiochem). The homogenate was  
401 then centrifuged at 4 °C for 30 mins at  $16,000 \times g$ . The supernatant (Tris-soluble fraction) was  
402 removed and aliquoted to store at -80 °C. 660 nm protein assay was used to assess protein  
403 concentration.

404

### 405 **Quantification of A $\beta$ production by Meso Scale Discovery Assay**

406

407 A $\beta$ 38, A $\beta$ 40 and A $\beta$ 42 product levels were quantified on Multi-Spot 96 well plates pre-coated  
408 with anti-A $\beta$ 38, A $\beta$ 40, and A $\beta$ 42 antibodies obtained from Janssen Pharmaceutica using  
409 multiplex MSD technology, as described before in (27).

410

#### 411 **Sandwich ELISA for A $\beta$ oligomers**

412 Oligomeric A $\beta$  was detected using a sandwich ELISA adapted from (28) using 82E1  
413 monoclonal antibody for both capture and detection to exclude monomeric A $\beta$  from detection.  
414 Briefly, total hippocampus from 3-month old animals was homogenized using a mechanical  
415 homogenizer and disposable pestles (Anachem) in approximately 5 volumes of ice-cold Tris-  
416 buffered saline (TBS) (50 mM Tris-HCL, pH 8.0) containing a cocktail of protease and  
417 phosphatase inhibitors (Calbiochem). Homogenates were centrifuged at 16,000 x g at 4 °C for  
418 30 min, the resultant supernatant (the soluble TBS fraction) was stored at – 80 °C. For the  
419 sandwich ELISA, samples were incubated on 1 $\mu$ g/ml 96 well plate-bound 82E1 capture  
420 antibody followed by incubation with 0.75 $\mu$ g/ml Biotinylated 82E1 detection antibody. The  
421 plate was washed 5 times with PBS-T between each step. The standard curve was made up  
422 of 2-fold dilutions, ranging from 3678 to 3.6 pg/ml of a synthetic dimer with the A $\beta$ 1-11  
423 sequence (DAEFRHDSGYE) C-terminally linked via a cysteine residue (28) was ordered from  
424 rPeptide and supplied by Stratech.

425

426 NeutrAvidin-HRP (ThermoFisher Scientific) was added to the plate after which a colour  
427 reaction was generated by incubation with TMB (3,3',5,5'- tetramethylbenzidine) colorimetric  
428 substrate (1-Step Ultra TMB-ELISA Substrate Solution, ThermoFisher Scientific). The reaction  
429 was stopped with 2 M H<sub>2</sub>SO<sub>4</sub> and the plate read at 405nm with a Tecan Infinite M1000 plate-  
430 reader. The average reading from the three technical replicates and the standard deviation for  
431 each standard were calculated to determine each one's percent coefficient of variation (%CV).  
432 The lower limit of detection (LLOD) was calculated as 2.5 times the standard deviation of the  
433 blank standard. The acceptable limits for each sample's %CV value were then taken to fall  
434 between the LLOD percentage and 10%. The standard curve was plotted and the region of  
435 linearity with the best R-square value was determined empirically. The estimated  
436 concentration for each standard was calculated from the plot equation and was divided by the  
437 assigned concentration to assess their similarity (% backfit). The lower limit and upper limits  
438 of quantification (LLOQ and ULOQ) were set to fall between 80 and 120% of the % backfit  
439 values. The concentration of each sample was then determined according to the above limits.

440

#### 441 **Implantation of subcutaneous EEG transmitters**

442 Animals were anesthetized using 4% 1mg/l isoflurane vapour (Isothesia, Henry Schein Animal  
443 Health, UK), then maintained on approximately 1.5% isoflurane vapour. All animals received  
444 saline bolus prior to and after surgery, and Metacam (Boehringer) and buprenorphine (Vibec)  
445 analgesia. Intracranial electrodes were implanted 1 mm into the right parietal cortex (-2.06,  
446 +2.50, with reference to bremga) and right motor cortex (+1.00, +1.5, with reference to  
447 bremga), via holes drilled through the skull. Electrodes were connected to single channel  
448 radio-transmitter (A3028B-AA, frequency dynamic range of 0.3-160 Hz, sampling rate of 512  
449 per second (SPS) 600 hours recording or A3028C-AA frequency dynamic range of 0.3-80 Hz,  
450 256 SPS, 950 hours recording) and battery implanted subcutaneously in the animals body  
451 (Open Source Instruments), such that EEG recordings could be made continuously from an  
452 untethered animal in its home-cage. EEG was recorded in freely moving animals continuously  
453 over a period of 6-21 days inside a faraday cage, signals recorded using LWDAQ software, in  
454 NDF file format.

455

#### 456 **Automated seizure and sub-clinical epileptiform activity detection**

457 Automated seizure detection using an ECP16V1 processing script Neuroarchiver v101  
458 (software available at <http://alignment.hep.brandeis.edu/Software/>), was used which  
459 calculates numerical metrics for 6 EEG properties: power, coastline, intermittency, coherence,  
460 asymmetry, and rhythm, over each second of EEG (source code available at:  
461 [http://www.opensourceinstruments.com/Electronics/A3018/Seizure\\_Detection.html](http://www.opensourceinstruments.com/Electronics/A3018/Seizure_Detection.html)). A library  
462 of 1-second EEG segments containing visually identified examples of seizures, sub-clinical  
463 epileptiform activity (SCEA), baseline EEG and movement artefacts was created using the  
464 'event classifier' feature in Neuroarchiver v101. The threshold used was 0.04 for SCEA and  
465 0.1 for seizures. All events were then checked manually to exclude false positives. Seizures  
466 were defined as high frequency and high amplitude spiking activity lasting longer than 10s.  
467 Any spiking lasting less than 10 seconds was classified as SCEA. Event frequency was  
468 normalised by the number of days of recording.

469

#### 470 **Immunohistochemistry of mouse brain**

471

472 Half brains were immersion fixed in 10 % buffered formal saline (Pioneer Research Chemicals)  
473 for a minimum of 48 hours prior to being processed to wax (Leica ASP300S tissue processor).  
474 The blocks were trimmed laterally from the midline by ~0.9-1.4 mm to give a sagittal section  
475 of the hippocampal formation. Two 4 µm sections 40 µm apart were analysed. The sections

476 were pretreated with 98 % formic acid for 8 minutes, followed by washing. The slides were  
477 wet loaded onto a Ventana XT for staining (Ventana Medical Systems, Tuscon, AZ, USA).  
478 The protocol included the following steps: heat induced epitope retrieval (mCC1) for 30  
479 minutes in Tris Boric acid EDTA buffer (pH 9.0), superbloc (8mins) and manual application  
480 of 100µl of directly biotinylated mouse monoclonal IgG1 antibodies against A $\beta$  (82E1, IBL, 0.2  
481 µg/ml or 4G8, Millipore, 2 µg/ml) for 8 hours. The staining was visualised using the Ventana  
482 DabMap kit (iView DAB, Ventana Medical Systems), followed by 4mins of haematoxylin and  
483 blueing. Alternatively, for staining of Beta-amyloid, slides were incubated with mouse  
484 monoclonal 6F/3D (Dako 1:50) followed by Iview Ig secondary antibody (Ventana Medical  
485 Systems). The sections were dehydrated, cleared and mounted in DPX prior to scanning  
486 (Leica SCN400F scanner). All images were analysed using Definiens Tissue Studio software  
487 (Definiens Inc). 6F/3D stained slides were photographed (ImageView II 3.5 Mpix digital  
488 camera) and composed with Adobe Photoshop so that the entire cortex could be analysed.  
489 The same thresholds for staining intensity were then used to quantify the area covered by  
490 DAB stain using Volocity image analysis software (Perkin Elmer).

#### 491 **Statistical analysis**

492 Data were analysed as indicated in figure legends by either two-tailed students T-test (single  
493 variable study), univariate ANOVA (to control for multiple variables) or by Mann-Whitney U, a  
494 non-parametric test, in cases where sample groups failed a Levene's test for equality of  
495 distribution between samples. For ANOVA, between-subject factors were trisomy and sex,  
496 with age in days included as a covariate. For cases when the number of technical replicates  
497 varied between subjects, subject means were calculated and used in the ANOVA. For MSD  
498 assays, fractionation batch was included as a covariate. For MSD assays and A $\beta$   
499 immunohistochemistry data, data points which were greater than three times the interquartile  
500 range of its group were excluded from analysis and reported in the figure legend.

501

## 502 References

- 503 1. F. K. Wiseman, T. Al-Janabi, J. Hardy, A. Karmiloff-Smith, D. Nizetic, V. L. J.  
504 Tybulewicz, E. M. C. Fisher, A. Strydom, A genetic cause of Alzheimer disease:  
505 mechanistic insights from Down syndrome. *Nat. Rev. Neurosci.*, 1–11 (2015).
- 506 2. M. McCarron, P. McCallion, A. Coppus, J. Fortea, S. Stemp, M. Janicki, K.  
507 Wtachman, Supporting advanced dementia in people with Down syndrome and other  
508 intellectual disability: consensus statement of the International Summit on Intellectual  
509 Disability and Dementia. *J. Intellect. Disabil. Res.* **62**, 617–624 (2018).
- 510 3. R. Hithersay, C. M. Startin, S. Hamburg, K. Y. Mok, J. Hardy, E. M. C. Fisher, V. L. J.  
511 Tybulewicz, D. Nizetic, A. Strydom, Association of Dementia with Mortality among  
512 Adults with Down Syndrome Older Than 35 Years. *JAMA Neurol.* **76**, 152–160 (2019).
- 513 4. S. E. Antonarakis, Down syndrome and the complexity of genome dosage imbalance.  
514 *Nat. Rev. Genet.* **18**, 147–163 (2017).
- 515 5. V. P. Prasher, V. H. R. Krishnan, Age of onset and duration of dementia in people  
516 with down syndrome: Integration of 98 reported cases in the literature. *Int. J. Geriatr.*  
517 *Psychiatry.* **8**, 915–922 (1993).
- 518 6. E. Head, I. T. Lott, D. M. Wilcock, C. A. Lemere, Aging in Down Syndrome and the  
519 Development of Alzheimer’s Disease Neuropathology. *Curr. Alzheimer Res.* **13**, 18–  
520 29 (2016).
- 521 7. R. Kimura, K. Kamino, M. Yamamoto, A. Nuripa, T. Kida, H. Kazui, R. Hashimoto, T.  
522 Tanaka, T. Kudo, H. Yamagata, Y. Tabara, T. Miki, H. Akatsu, K. Kosaka, E.  
523 Funakoshi, K. Nishitomi, G. Sakaguchi, A. Kato, H. Hattori, T. Uema, M. Takeda, The  
524 DYRK1A gene, encoded in chromosome 21 Down syndrome critical region, bridges  
525 between  $\beta$ -amyloid production and tau phosphorylation in Alzheimer disease. *Hum.*  
526 *Mol. Genet.* **16**, 15–23 (2007).
- 527 8. J. H. Lee, A. J. Lee, L.-H. Dang, D. Pang, S. Kisselev, S. J. Krinsky-McHale, W. B.  
528 Zigman, J. A. Luchsinger, W. Silverman, B. Tycko, L. N. Clark, N. Schupf, Candidate  
529 gene analysis for Alzheimer’s disease in adults with Down syndrome. *Neurobiol.*  
530 *Aging.* **56**, 150–158 (2017).
- 531 9. K. Y. Mok, E. L. Jones, M. Hanney, D. Harold, R. Sims, J. Williams, C. Ballard, J.  
532 Hardy, Polymorphisms in BACE2 may affect the age of onset Alzheimer’s dementia in  
533 Down syndrome. *Neurobiol. Aging.* **35**, 1513e1-5 (2014).
- 534 10. Y. Jiang, Y. Sato, E. Im, M. Berg, M. Bordi, S. Darji, A. Kumar, P. S. Mohan, U.  
535 Bandyopadhyay, A. Diaz, A. M. Cuervo, R. A. Nixon, Lysosomal Dysfunction in Down  
536 Syndrome Is APP-Dependent and Mediated by APP- $\beta$ CTF (C99). *J. Neurosci.* **39**,  
537 5255–5268 (2019).



- 538 11. H. Ahlfors, N. Anyanwu, E. Pakanavicius, N. Dinischiotu, E. Lana-Elola, S. Watson-  
539 Scales, J. Tosh, F. Wiseman, J. Briscoe, K. Page, E. M. C. Fisher, V. L. J.  
540 Tybulewicz, Gene expression dysregulation domains are not a specific feature of  
541 Down syndrome. *Nat. Commun.* **10**, 2489 (2019).
- 542 12. F. K. Wiseman, L. J. Pulford, C. Barkus, F. Liao, E. Portelius, R. Webb, L. Chávez-  
543 Gutiérrez, K. Cleverley, S. Noy, O. Sheppard, T. Collins, C. Powell, C. J. Sarell, M.  
544 Rickman, X. Choong, J. L. Tosh, C. Siganporia, H. T. Whittaker, F. Stewart, M.  
545 Szaruga, London Down syndrome consortium, M. P. Murphy, K. Blennow, B. de  
546 Strooper, H. Zetterberg, D. Bannerman, D. M. Holtzman, V. L. J. Tybulewicz, E. M. C.  
547 Fisher, Trisomy of human chromosome 21 enhances amyloid- $\beta$  deposition  
548 independently of an extra copy of APP. *Brain* (2018).
- 549 13. E. Lana-Elola, S. Watson-Scales, A. Slender, D. Gibbins, A. Martineau, C. Douglas,  
550 T. Mohun, E. M. Fisher, V. L. Tybulewicz, Genetic dissection of Down syndrome-  
551 associated congenital heart defects using a new mouse mapping panel. *Elife.* **5**, 1–20  
552 (2016).
- 553 14. T. Yu, C. Liu, P. Belichenko, S. J. Clapcote, S. Li, A. Pao, A. Kleschevnikov, A. R.  
554 Bechard, S. Asrar, R. Chen, N. Fan, Z. Zhou, Z. Jia, C. Chen, J. C. Roder, B. Liu, A.  
555 Baldini, W. C. Mobley, Y. E. Yu, Effects of individual segmental trisomies of human  
556 chromosome 21 syntenic regions on hippocampal long-term potentiation and  
557 cognitive behaviors in mice. *Brain Res.* **1366**, 162–71 (2010).
- 558 15. T. Yu, S. J. Clapcote, Z. Li, C. Liu, A. Pao, A. R. Bechard, S. Carattini-Rivera, S. I.  
559 Matsui, J. C. Roder, A. Baldini, W. C. Mobley, A. Bradley, Y. E. Yu, Deficiencies in the  
560 region syntenic to human 21q22.3 cause cognitive deficits in mice. *Mamm. Genome.*  
561 **21**, 258–267 (2010).
- 562 16. H. A. Born, J. Y. Kim, R. R. Savjani, P. Das, Y. A. Dabaghian, Q. Guo, J. W. Yoo, D.  
563 R. Schuler, J. R. Cirrito, H. Zheng, T. E. Golde, J. L. Noebels, J. L. Jankowsky,  
564 Genetic suppression of transgenic APP rescues Hypersynchronous network activity in  
565 a mouse model of Alzheimer’s disease. *J. Neurosci.* **34**, 3826–40 (2014).
- 566 17. L. Mucke, D. J. Selkoe, Neurotoxicity of amyloid  $\beta$ -protein: synaptic and network  
567 dysfunction. *Cold Spring Harb. Perspect. Med.* **2**, a006338 (2012).
- 568 18. J. J. Palop, J. Chin, E. D. Roberson, J. Wang, M. T. Thwin, N. Bien-Ly, J. Yoo, K. O.  
569 Ho, G.-Q. Yu, A. Kreitzer, S. Finkbeiner, J. L. Noebels, L. Mucke, Aberrant excitatory  
570 neuronal activity and compensatory remodeling of inhibitory hippocampal circuits in  
571 mouse models of Alzheimer’s disease. *Neuron.* **55**, 697–711 (2007).
- 572 19. H. A. Born, Seizures in Alzheimer’s disease. *Neuroscience.* **286C**, 251–263 (2015).
- 573 20. M. D. Lalioti, M. Mirotsoy, C. Buresi, M. C. Peitsch, C. Rossier, R. Ouazzani, M.  
574 Baldy-Moulinier, A. Bottani, A. Malafosse, S. E. Antonarakis, Identification of

- 575 mutations in cystatin B, the gene responsible for the Unverricht-Lundborg type of  
576 progressive myotonus epilepsy (EPM1). *Am. J. Hum. Genet.* **60**, 342–351 (1997).
- 577 21. V. Brault, B. Martin, N. Costet, J. C. Bizot, Y. Hérault, Characterization of PTZ-  
578 induced seizure susceptibility in a down syndrome mouse model that overexpresses  
579 CSTB. *PLoS One.* **6** (2011).
- 580 22. Y. Hérault, J. M. Delabar, E. M. C. Fisher, V. L. J. Tybulewicz, E. Yu, V. Brault,  
581 Rodent models in Down syndrome research: impact and future opportunities. *Dis.*  
582 *Model. Mech.* **10**, 1165–1186 (2017).
- 583 23. P. J. Zhu, S. Khatiwada, Y. Cui, L. C. Reineke, S. W. Dooling, J. J. Kim, W. Li, P.  
584 Walter, M. Costa-Mattioli, Activation of the ISR mediates the behavioral and  
585 neurophysiological abnormalities in Down syndrome. *Science (80-. )*. **366**, 843–849  
586 (2019).
- 587 24. S. D. Lhatoo, H. J. Faulkner, K. Dembny, K. Trippick, C. Johnson, J. M. Bird, An  
588 electroclinical case-control study of sudden unexpected death in epilepsy. *Ann.*  
589 *Neurol.* **68**, 787–796 (2010).
- 590 25. L. P. Sowers, C. A. Massey, B. K. Gehlbach, M. A. Granner, G. B. Richerson, Sudden  
591 unexpected death in epilepsy: Fatal post-ictal respiratory and arousal mechanisms.  
592 *Respir. Physiol. Neurobiol.* **189**, 315–323 (2013).
- 593 26. G. M. Shankar, M. A. Leissring, A. Adame, X. Sun, E. Spooner, E. Masliah, D. J.  
594 Selkoe, C. A. Lemere, D. M. Walsh, Biochemical and immunohistochemical analysis  
595 of an Alzheimer's disease mouse model reveals the presence of multiple cerebral  
596 Abeta assembly forms throughout life. *Neurobiol. Dis.* **36**, 293–302 (2009).
- 597 27. M. Szaruga, S. Veugelen, M. Benurwar, S. Lismont, D. Sepulveda-Falla, A. Lleo, N.  
598 S. Ryan, T. Lashley, N. C. Fox, S. Murayama, H. Gijssen, B. De Strooper, L. Chávez-  
599 Gutiérrez, Qualitative changes in human  $\gamma$ -secretase underlie familial Alzheimer's  
600 disease. *J. Exp. Med.* **212**, 2003–2013 (2015).
- 601 28. M. Hölttä, O. Hansson, U. Andreasson, J. Hertzze, L. Minthon, K. Nägga, N.  
602 Andreasen, H. Zetterberg, K. Blennow, Evaluating Amyloid- $\beta$  Oligomers in  
603 Cerebrospinal Fluid as a Biomarker for Alzheimer's Disease. *PLoS One.* **8**, 1–8  
604 (2013).

605

## 606 **Acknowledgement**

607 F.K.W. is supported by the UK Dementia Research Institute which receives its funding  
608 from DRI Ltd, funded by the UK Medical Research Council, Alzheimer's Society and  
609 Alzheimer's Research UK and by an Alzheimer's Research UK Senior Research Fellowship.  
610 FKW also received funding that contributed to the work in this paper from Epilepsy Research  
611 UK and the MRC via CoEN award MR/S005145/1. J.L.T. was funded by an Alzheimer's Society

612 PhD studentship awarded to F.K.W. and EMCF. L.J.P. was funded by an Alzheimer's  
613 Research UK PhD studentship awarded to F.K.W. and E.M.C.F. The authors were funded by  
614 a Wellcome Trust Strategic Award (grant number: 098330/Z/12/Z) awarded to The London  
615 Down Syndrome (LonDownS) Consortium (V.L.J.T., and E.M.C.F). Additionally, the authors  
616 were funded by a Wellcome Trust Joint Senior Investigators Award (V.L.J.T. and E.M.C.F.,  
617 grant numbers: 098328, 098327), the Medical Research Council (programme number  
618 U117527252; awarded to V.L.J.T). V.L.J.T. is also funded by the Francis Crick Institute which  
619 receives its core funding from the Medical Research Council (FC001194), Cancer Research  
620 UK (FC001194) and the Wellcome Trust (FC001194). R.C.W. holds a Senior Research  
621 fellowship funded by the Worshipful Company of Pewterers and an Epilepsy Research UK  
622 Fellowship (F1401).

623 We thank Professor S. Schorge (Royal Society fellowship URF (UF140596)), Dr. Amanda  
624 Heslegrave and Dr. Matthew Ellis for assistance with this project.

625

626

627 F.K.W. has undertaken consultancy for Elkington and Fife Patent Lawyers unrelated to the  
628 work in the manuscript.

629

630 J.T undertook biochemical and histological experiments, undertook data analysis and wrote  
631 the manuscript. P.M. undertook data analysis and wrote the manuscript. H.T.W, E.R. and  
632 L.J.P. undertook biochemical and histological experiments, S.N undertook histological  
633 experiments and K.C. undertook biochemical experiments and genotyping. R.C.W, S.S and  
634 M.C.W. oversaw the EEG study and R.C.W and L.J.P undertook the EEG experiments and  
635 data analysis. E.M.C.F. and V.L.J.T designed and supervised the study and wrote the  
636 manuscript. F.K.W. designed and supervised the study, undertook data analysis and wrote  
637 the manuscript.

638

639

640

641

642

643

644

645

646 **Fig.1**

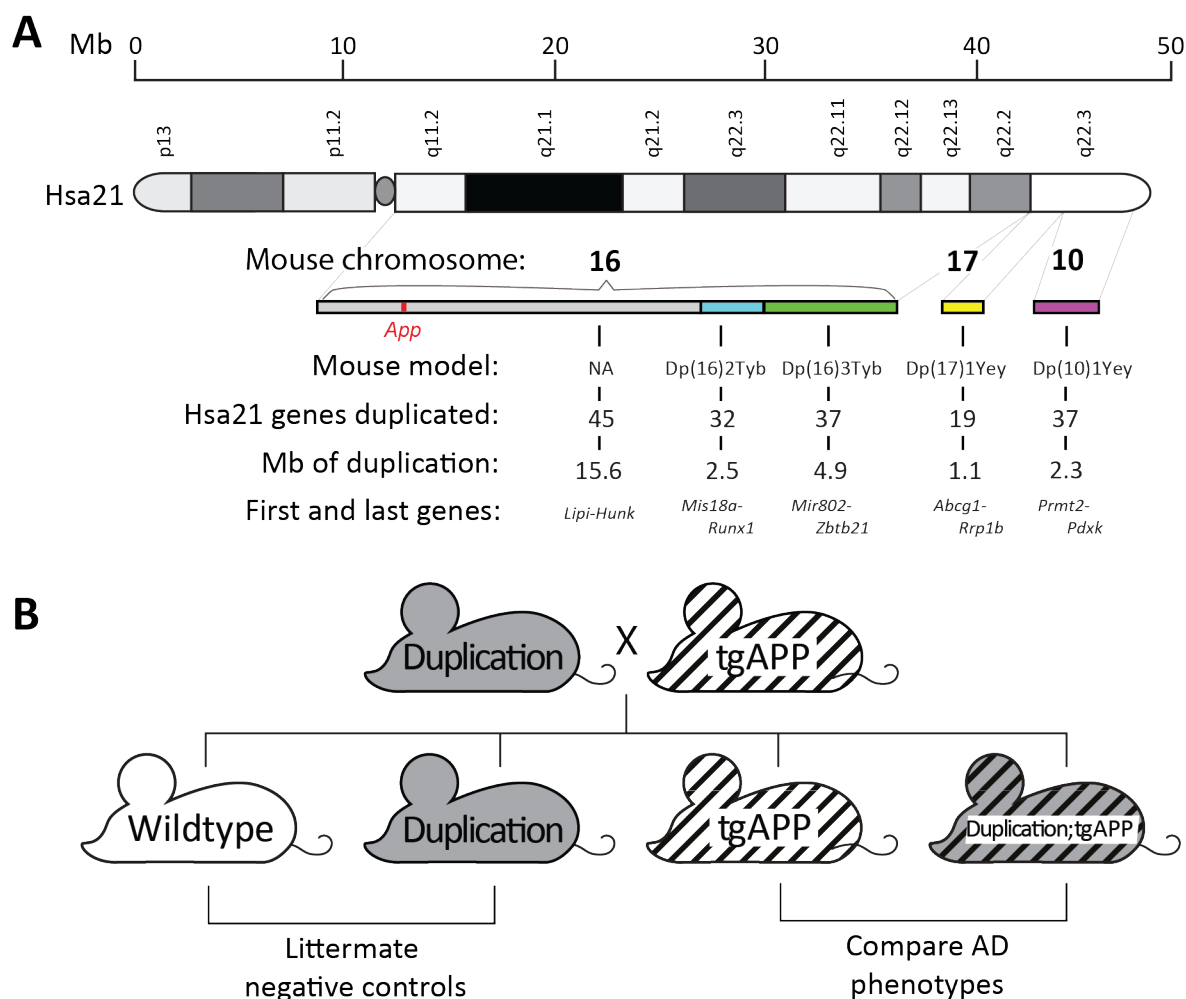

647

648 **Fig. 1. Mapping DS-AD associated phenotypes: analysis of progeny from crosses of**  
 649 **J20 tgAPP with DS segmental duplication models.**

650 **(A)** Regions of Hsa21 homology on mouse chromosomes 16, 17 and 10 in the Dp(16)2Tyb,  
 651 Dp(16)3Tyb, Dp(10)1Yey and Dp(17)1Yey segmental duplication models of DS. An ideogram  
 652 of Hsa21 with major karyotypic bands is shown, with a megabase (Mb) scale. Below this are  
 653 graphical representations of the relative sizes of Hsa21 orthologous regions in the mouse and  
 654 the subregions which are segmentally duplicated in each DS mouse model used in this study.  
 655 These are colour coded: Dp(16)2Tyb is light blue, Dp(16)3Tyb is green, Dp(10)1Yey is purple,  
 656 and Dp(17)1Yey is yellow. “NA” refers to a subregion not modelled in this study. The number  
 657 of Hsa21 orthologous genes, Mb size, first and last genes in each duplication are shown. **(B)**  
 658 Schematic of the cross of the segmental duplication models of DS crossed with the J20 *APP*  
 659 transgenic model (tgAPP).

660

661 **Fig. 2**

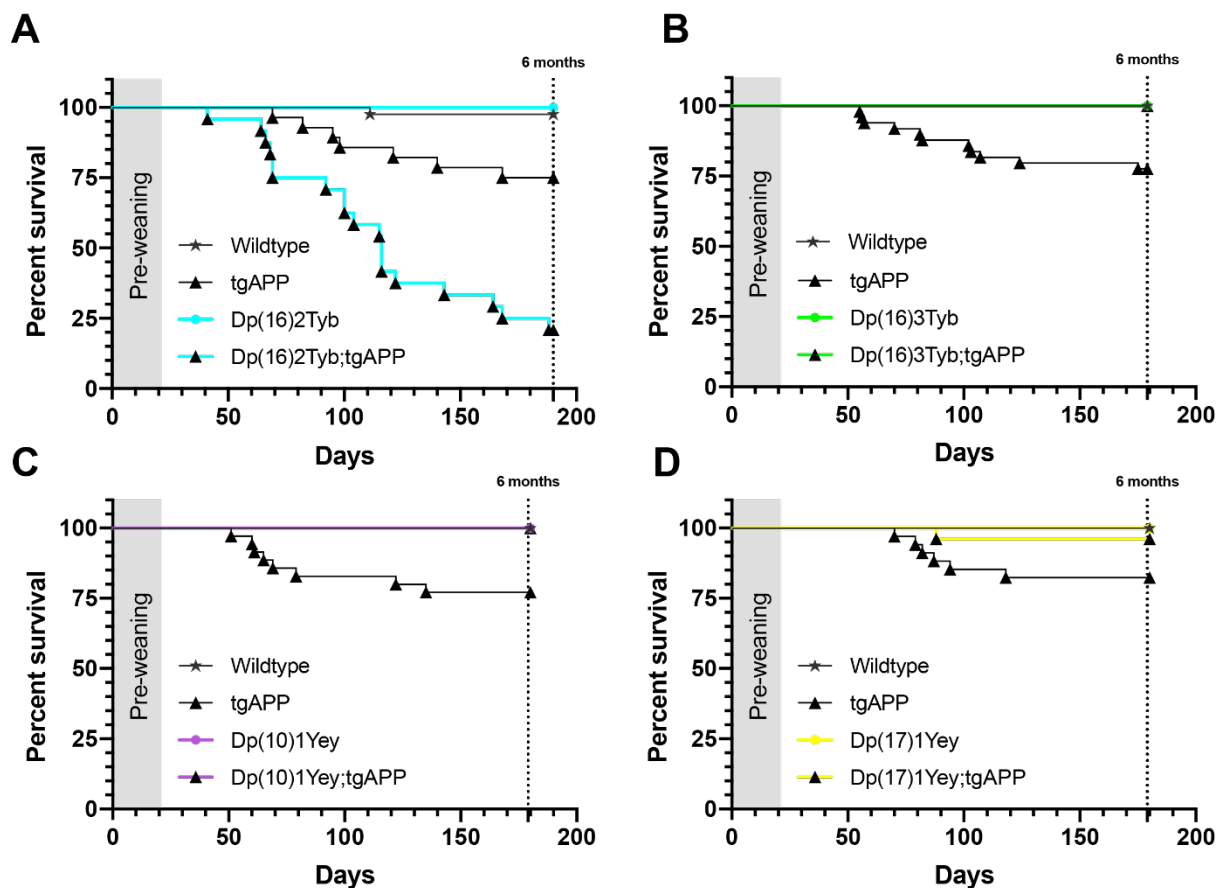

662

663 **Fig. 2. The effect of DS segmental duplication models on J20 tgAPP-associated**  
 664 **mortality.**

665 **(A)** Survival of Dp(16)2Tyb;tgAPP male and female mice to 6-months of age is significantly  
 666 reduced compared to tgAPP controls (Mantel-Cox log-rank test  $X^2 = 47.872$   $p < 0.001$ ).  
 667 (Wildtype male  $n = 21$ , female  $n = 16$ ; Dp(16)2Tyb male  $n = 7$ , female  $n = 6$ ; tgAPP male  $n =$   
 668 16, female  $n = 12$ ; Dp(16)2Tyb;tgAPP male  $n = 7$ , female  $n = 21$ ).

669 **(B)** Survival of Dp(16)3Tyb;tgAPP male and female mice to 6-months of age is significantly  
 670 increased compared to tgAPP controls (Mantel-Cox log-rank test  $X^2 = 33.58$   $p < 0.001$ ).  
 671 (Wildtype male  $n = 23$ , female  $n = 34$ ; Dp(16)3Tyb male  $n = 19$ , female  $n = 20$ ; tgAPP male  $n =$   
 672 21, female  $n = 28$ ; Dp(16)3Tyb;tgAPP male  $n = 18$ , female  $n = 20$ ).

673 **(C)** Survival of Dp(10)1Yey;tgAPP male and female mice to 6-months of age is significantly  
 674 increased compared to tgAPP controls (Mantel-Cox log-rank test  $X^2 = 8.414$   $p = 0.004$ ).  
 675 (Wildtype male  $n = 15$ , female  $n = 23$ ; Dp(10)1Yey male  $n = 19$ , female  $n = 27$ ; tgAPP male  $n =$   
 676 17, female  $n = 18$ ; Dp(10)1Yey;tgAPP male  $n = 11$ , female  $n = 22$ ).

677 **(D)** Survival of Dp(17)1Yey;tgAPP male and female mice to 6-months of age is significantly  
 678 increased compared to tgAPP controls (Mantel-Cox log-rank test  $X^2 = 12.56$   $p = 0.0057$ ).  
 679 (Wildtype male  $n = 14$ , female  $n = 18$ ; Dp(10)1Yey male  $n = 11$ , female  $n = 15$ ; tgAPP male  $n =$

680 = 16, female n = 18; Dp(10)1Yey;tgAPP male n = 12, female n = 14). Both sexes included in  
681 analysis.

682

683

684

685

686 **Fig.3**

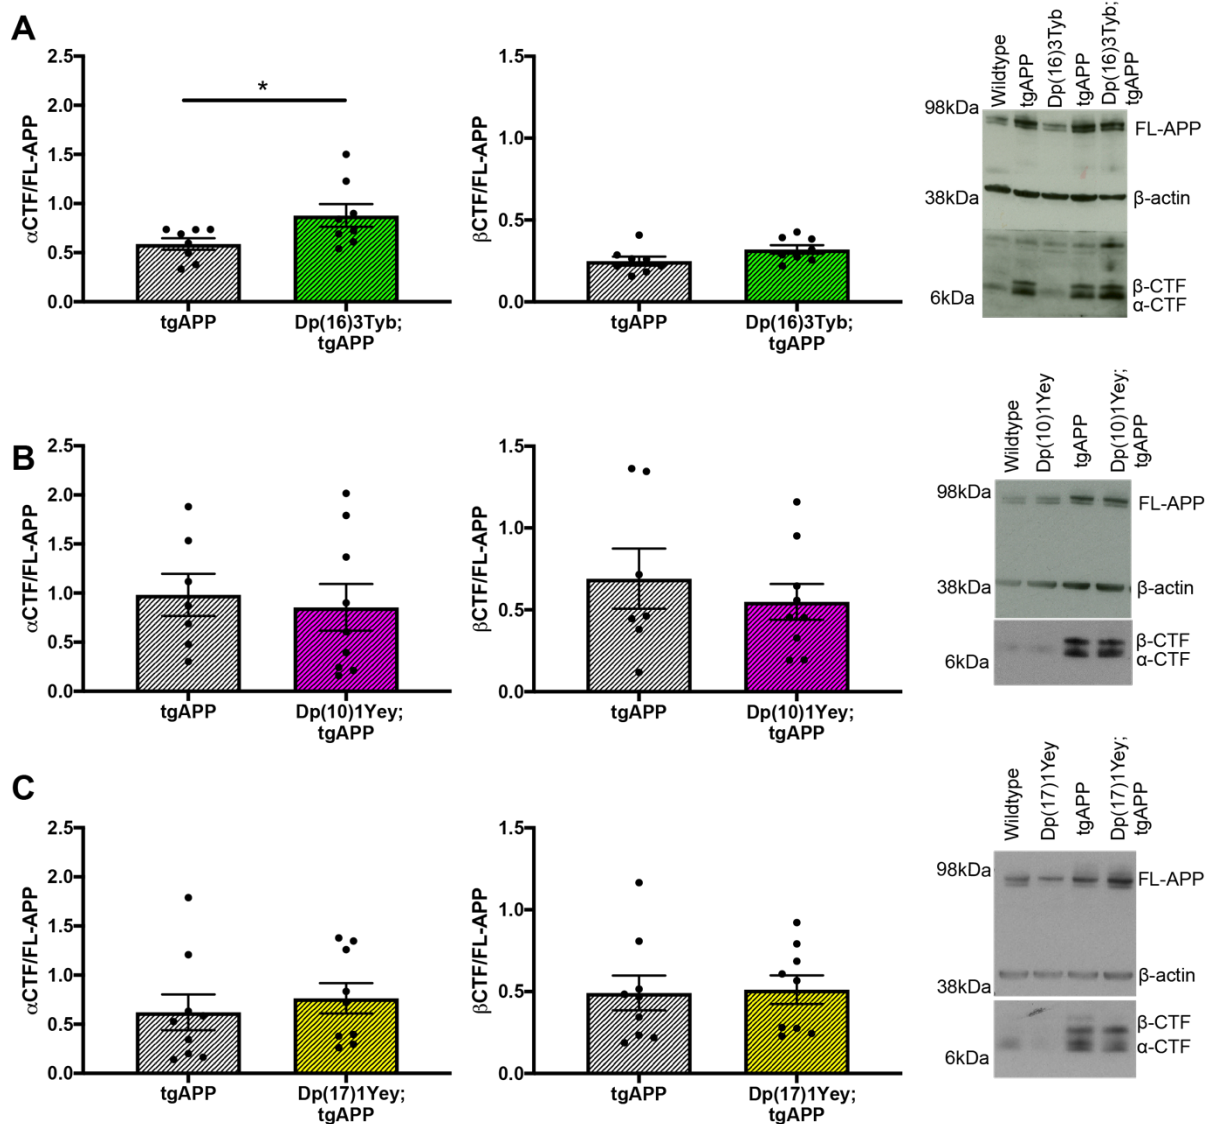

687

688 **Fig. 3. The effect of DS segmental duplication models on CTF abundance in the brain.**

689 **(A-C)** The relative abundance of APP  $\beta$ -C-terminal fragment ( $\beta$ -CTF) and APP  $\alpha$ -C-terminal  
 690 fragment ( $\alpha$ -CTF) compared to full-length APP (FL-APP) was measured by western blot using  
 691 A8717 primary antibody in the cortex at 3-months of age in female and male mice. **(A)**  
 692 Significantly more  $\alpha$ -CTF was observed in Dp(16)3Tyb;tgAPP (n = 8, 4 male and 4 female)  
 693 than tgAPP (n = 8, 4 male and 4 female) controls ( $F(1,12) = 5.226$ ,  $p = 0.041$ ),  $\beta$ -CTF was not  
 694 raised in this double mutant mouse ( $F(1,13) = 3.005$ ,  $p = 0.107$ ). **(B)** In Dp(10)1Yey;tgAPP  
 695 mice (n = 11, 7 male and 4 female) neither  $\alpha$ -CTF ( $F(1,12) = 0.143$ ,  $p = 0.712$ ) nor  $\beta$ -CTF  
 696 ( $F(1,12) = 0.291$ ,  $p = 0.599$ ) abundance differed from tgAPP (n = 7, 3 male and 4 female)  
 697 controls. **(C)** In Dp(17)1Yey;tgAPP (n = 9, 6 male and 3 female) mice neither  $\alpha$ -CTF ( $F(1,13)$   
 698 = 0.350,  $p = 0.363$ ) nor  $\beta$ -CTF ( $F(1,13) = 0.566$ ,  $p = 0.465$ ) abundance differed from tgAPP (n  
 699 = 9, 3 male and 6 female) controls. Error bars show SEM, data points are independent mice.

700

701 **Fig4.**

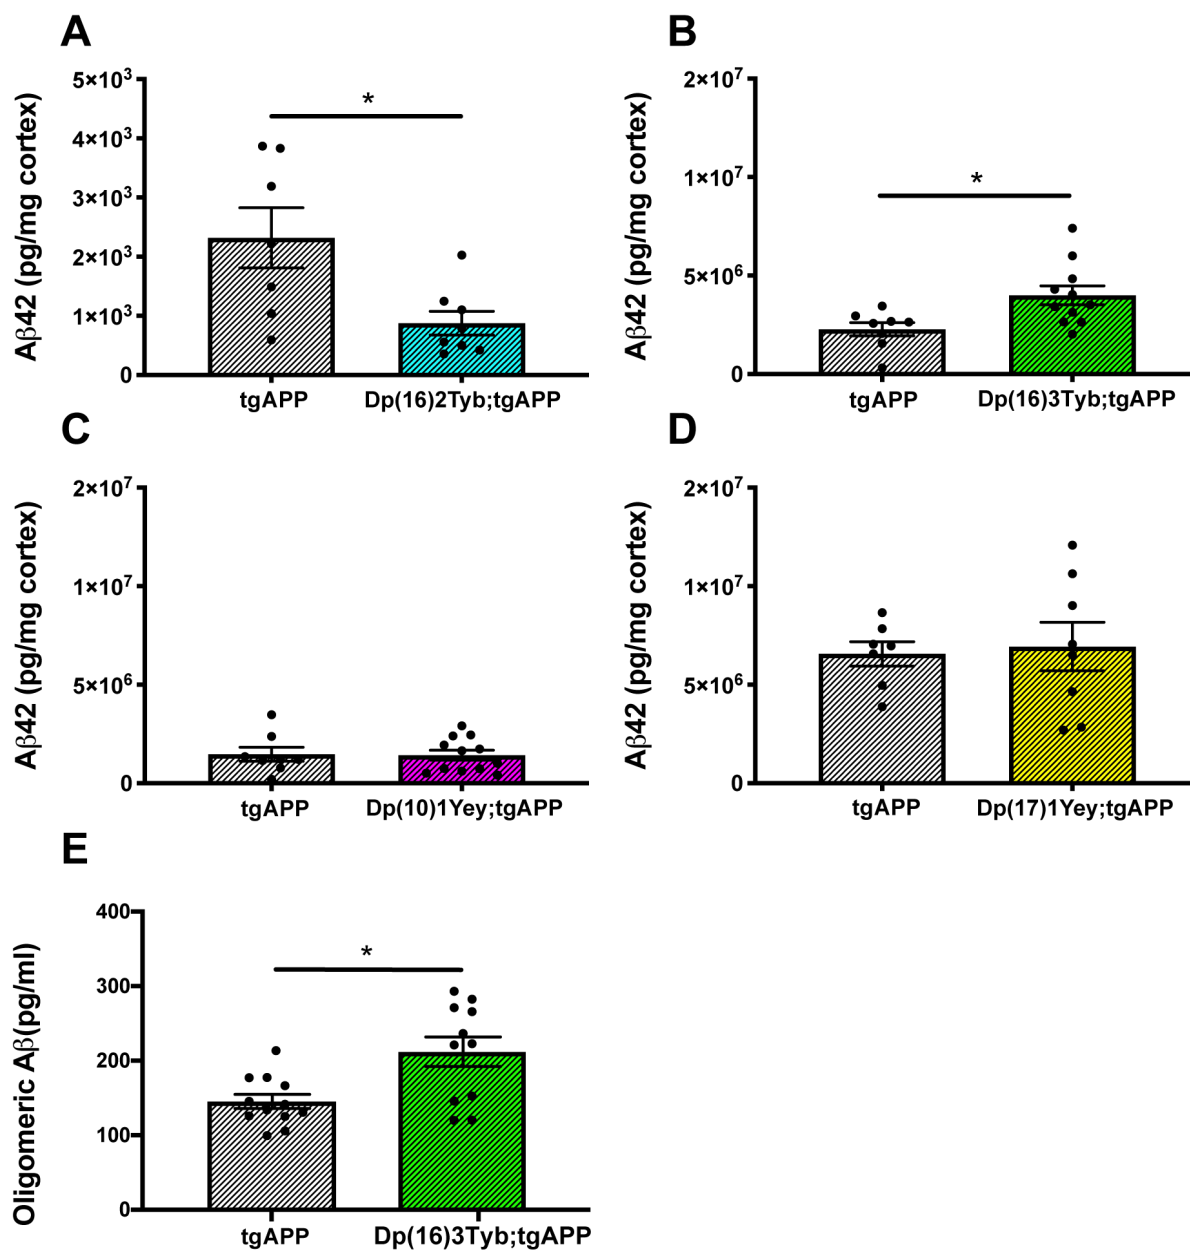

702

703 **Fig. 4. The effect of DS segmental duplication models on insoluble amyloid- $\beta_{42}$  in the**  
704 **cortex. (A-D)** Cortical proteins from 6- and 12-month old mice were fractionated and 5 M  
705 guanidine hydrochloride, soluble  $A\beta$  was quantified by Meso Scale Discovery Assay. Error  
706 bars show SEM, data points are independent mice.

707 **(A)** In Dp(16)2Tyb;tgAPP (n = 8, 3 male and 5 female) mice at 6 months of age, median  
708 amyloid- $\beta_{42}$  abundance is significantly decreased ( $U(N_{Dp(16)2Tyb;tgAPP} = 8, N_{tgAPP} = 7) = 8, p =$   
709  $0.021$ ) in cortex compared to tgAPP (n = 7, 2 male and 5 female) littermates. After systematic  
710 outlier testing one tgAPP sample was excluded prior to analysis.

711 **(B)** In Dp(16)3Tyb;tgAPP (n = 11, 7 male and 4 female) mice at 12 months of age, amyloid-  
712  $\beta_{42}$  abundance is significantly increased ( $F(1,13) = 4.656, p = 0.05$ ) compared to tgAPP (n =



713 8, 5 male and 3 female) littermates. After systematic outlier testing two tgAPP samples were  
714 excluded prior to analysis.

715 **(C)** In Dp(10)1Yey;tgAPP (n = 12, 6 male and 6 female) mice at 12 months of age, amyloid-  
716  $\beta_{42}$  abundance ( $F(1,14) = 0.027$ ,  $p = 0.872$ ) did not significantly differ compared to tgAPP (n =  
717 8, 5 male and 3 female) littermates. After systematic outlier testing one tgAPP sample and two  
718 Dp(10)1Yey;tgAPP samples were excluded prior to analysis.

719 **(D)** In Dp(17)1Yey;tgAPP (n = 8, 3 male and 5 female) mice at 12 months of age, amyloid- $\beta_{42}$   
720 abundance ( $F(1,9) = 2.115$   $p = 0.176$ ) did not significantly differ compared to tgAPP (n = 7, 4  
721 male and 3 female) littermates. After systematic outlier testing two tgAPP samples and one  
722 Dp(17)1Yey;tgAPP sample were excluded prior to analysis.

723 **(E)** In Dp(16)3Tyb;tgAPP (n = 11, 6 male and 5 female) mice at 3 months of age, median  
724 oligomeric A $\beta$  species were significantly increased  $U(N_{Dp(16)3Tyb;tgAPP} = 11, N_{tgAPP} = 12,) = 104$ ,  
725  $p = 0.019$ ) compared to tgAPP (n = 12, 8 male and 4 female) littermates.

726

727 **Fig. 5**

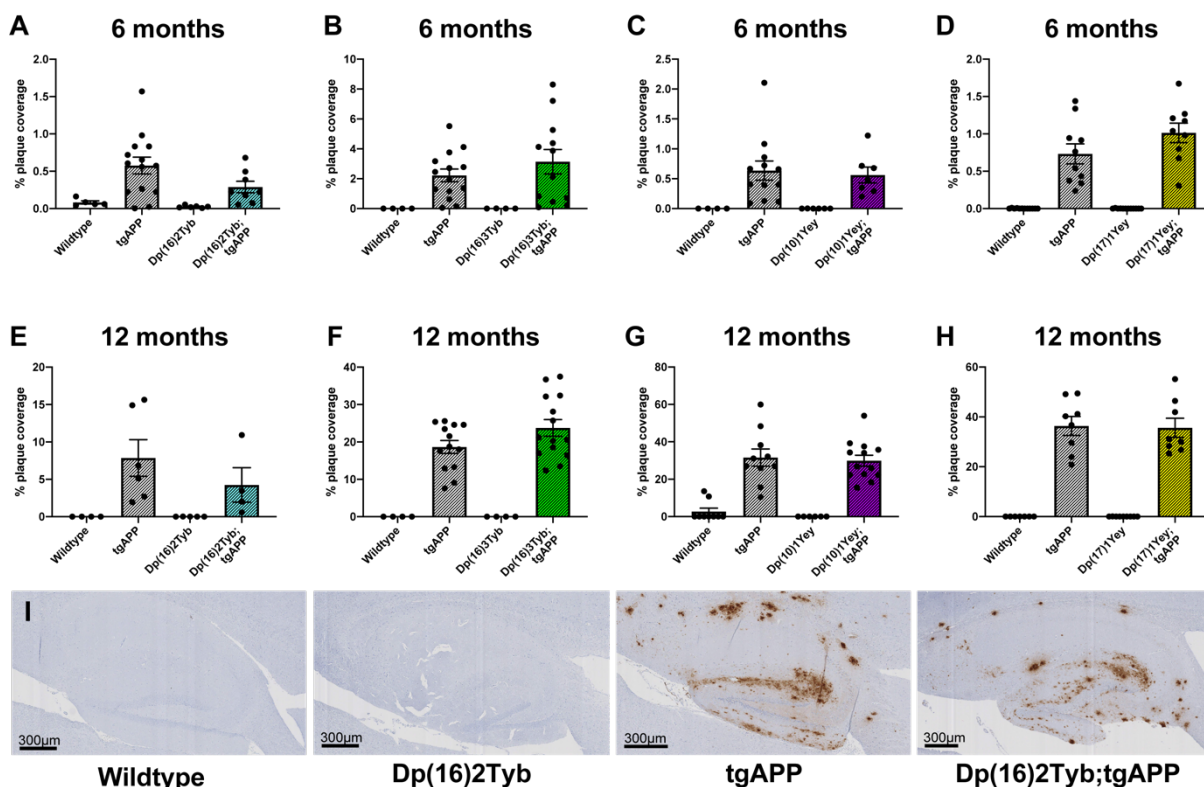

728

729 **Fig. 5. The effect of DS segmental duplication models on amyloid- $\beta$  in the hippocampus.**

730 Amyloid- $\beta$  deposition in the hippocampus was quantified at (A-D) 6- and (E-H) 12-months of  
 731 age in male and female mice, percentage of the region covered by stain was calculated.  
 732 Error bars show SEM, data points are independent mice.

733 **(A)** No significant difference in amyloid- $\beta$  deposition in the hippocampus was detected at 6-  
 734 months of age in Dp(16)2Tyb;tgAPP compared with tgAPP controls ( $F(1,17) = 2.372$ ,  $p =$   
 735  $0.142$ ) detected with 82E1 primary antibody. After systematic outlier testing one tgAPP  
 736 sample was excluded prior to analysis. Dp(16)2Tyb;tgAPP female  $n=5$ , male  $n=3$ ; tgAPP  
 737 female  $n=7$ , male  $n=7$ .

738 **(B)** No significant difference in amyloid- $\beta$  deposition in the hippocampus was detected at 6-  
 739 months of age in Dp(16)3Tyb;tgAPP compared with tgAPP controls ( $U(N_{Dp(16)3Tyb;tgAPP} = 12,$   
 740  $N_{tgAPP} = 14,) = 71$ ,  $p = 0.5267$ ) detected with 82E1 primary antibody. Dp(16)3Tyb;tgAPP  
 741 female  $n=6$ , male  $n=6$ ; tgAPP female  $n=7$ , male  $n=7$ .

742 **(C)** No significant difference in amyloid- $\beta$  deposition in the hippocampus was detected at 6-  
 743 months of age in Dp(10)1Yey;tgAPP compared with tgAPP controls ( $F(1,14) = 0.001$ ,  $p =$   
 744  $0.972$ ) detected with 4G8 primary antibody. Dp(10)1Yey;tgAPP female  $n=4$ , male  $n=3$ ;  
 745 tgAPP female  $n=5$ , male  $n=7$ .

746 **(D)** No significant difference in amyloid- $\beta$  deposition in the hippocampus was detected at 6-  
 747 months of age in Dp(17)1Yey;tgAPP compared with tgAPP controls ( $F(1,14) = 1.785$ ,  $p =$

748 0.203) detected with 4G8 primary antibody. Dp(17)1Yey;tgAPP female n=5, male n=4;  
749 tgAPP female n=6, male n=4.

750 **(E)** No significant difference in amyloid- $\beta$  deposition in the hippocampus was detected at 12-  
751 months of age in Dp(16)2Tyb;tgAPP compared with tgAPP controls ( $F(1,5) = 1.908$ ,  $p =$   
752  $0.226$ ) detected with 82E1 primary antibody. Dp(16)2Tyb;tgAPP female n=3, male n=1;  
753 tgAPP female n=3, male n=3.

754 **(F)** No significant difference in amyloid- $\beta$  deposition in the hippocampus was detected at 12-  
755 months of age in Dp(16)3Tyb;tgAPP compared with tgAPP controls ( $F(1,22) = 2.012$ ,  $p =$   
756  $0.170$ ) detected with 82E1 primary antibody. Dp(16)3Tyb;tgAPP female n=8, male n=6;  
757 tgAPP female n=7, male n=7.

758 **(G)** No significant difference in amyloid- $\beta$  deposition in the hippocampus was detected at 12-  
759 months of age in Dp(10)1Yey;tgAPP compared with tgAPP controls ( $F(1,18) = 0.131$ ,  $p =$   
760  $0.722$ ) detected with 4G8 primary antibody. Dp(10)1Yey;tgAPP female n=7, male n=6;  
761 tgAPP female n=6, male n=4.

762 **(H)** No significant difference in amyloid- $\beta$  deposition in the hippocampus was detected at 12-  
763 months of age in Dp(17)1Yey;tgAPP compared with tgAPP controls ( $F(1,11) = 0.021$ ,  $p =$   
764  $0.886$ ) detected with 4G8 primary antibody. Dp(17)1Yey;tgAPP female n=5, male n=3;  
765 tgAPP female n=5, male n=3.

766 **(I)** Representative image of Dp(16)2Tyb;tgAPP hippocampus at 12-months of age.

767

768 **Fig. 6**

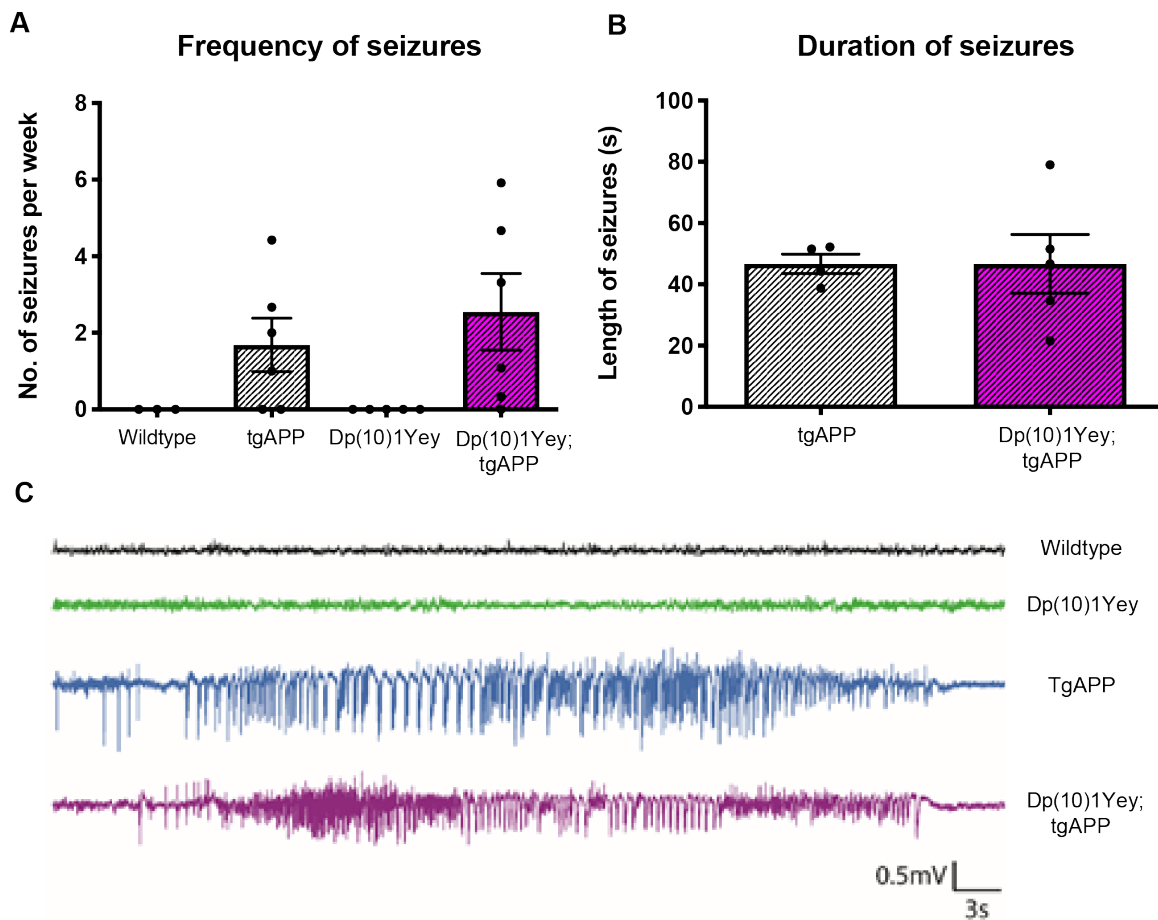

769

770 **Fig. 6. The Dp(10)1Yey segmental duplication did not alter the frequency or duration of**  
771 **APP transgene-associated seizures**

772 **(A)** The frequency and **(B)** duration of seizure-like events was measured in male mice by  
773 cortical EEG using implanted electrodes in freely moving mice in the home cage. **(A)** The  
774 frequency (T-test  $p = 0.60$ , tgAPP  $n = 6$ , Dp(10)1Yey;tgAPP  $n = 6$  all male) and **(B)** duration  
775 (T-test  $p = 0.64$ , tgAPP  $n = 6$ , Dp(10)1Yey;tgAPP  $n = 6$ ) of seizure-like events was not altered  
776 by the duplication of the Dp(10)1Yey region. **(C)** Example EEG trace of a seizure-like event in  
777 tgAPP and Dp10;tgAPP animals with control time-matched wildtype and Dp(10)1Yey  
778 littermates traces for comparison. Error bars show SEM, data points are independent mice.

779

780 **Supplementary material**

781 **Fig. S1**

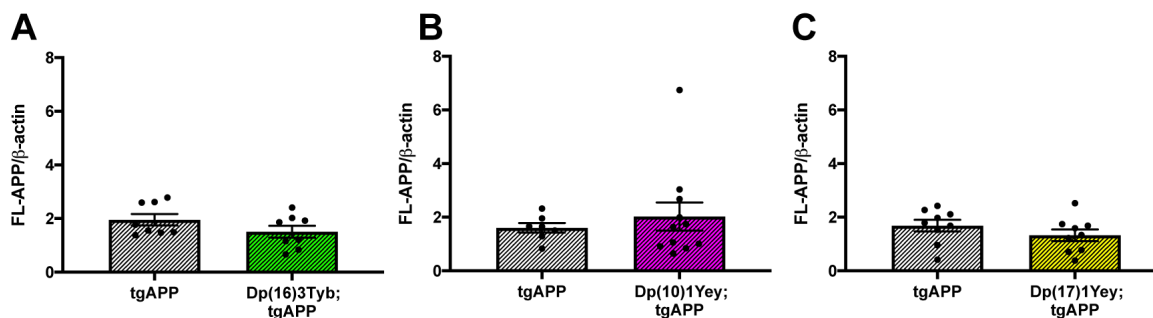

782

783 **Fig. S1 Abundance of FL-APP is not affected by duplications in the DS mouse models**  
784 **at 3-months of age in the cortex.**

785 The abundance of full-length APP (FL-APP) relative to β-actin loading control was measured  
786 by western blot using A8717 primary antibody in the cortex at 3-months of age in male and  
787 female mice. **(A)** There was no difference in FL-APP level between Dp(16)3Tyb;tgAPP (n = 8,  
788 4 male and 4 female) and tgAPP (n = 8, 4 male and 4 female) littermate controls ( $F(1,12) =$   
789  $1.896$ ,  $p = 0.194$ ). **(B)** No difference in FL-APP level between Dp(10)1Yey;tgAPP (n = 11, 7  
790 male and 4 female) and tgAPP (n = 7, 3 male and 4 female) littermate controls ( $F(1,14) =$   
791  $0.520$ ,  $p = 0.576$ ). **(C)** No difference in FL-APP level between Dp(17)1Yey;tgAPP mice (n =  
792 9, 6 male and 3 female) and tgAPP littermate controls ( $F(1,14) = 0.500$ ,  $p = 0.491$ ). Error bars  
793 show SEM, data points are independent mice.

794

795 **Fig. S2**

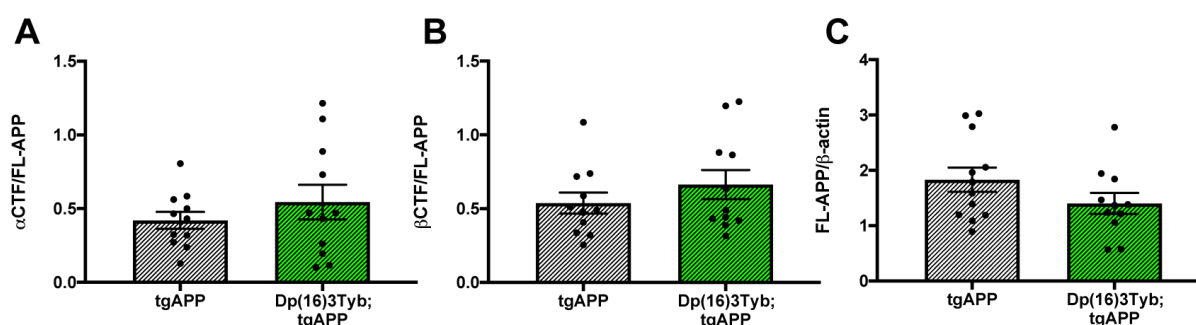

796

797 **Fig. S2 Abundance of FL-APP and CTFs is not altered by the Dp(16)3Tyb duplication at**  
798 **3-months of age in the hippocampus.**

799 The abundance of full-length APP (FL-APP) relative to β-actin loading control, and APP β-C-  
800 terminal fragment (β-CTF) and APP α-C-terminal fragment (α-CTF) relative to full-length APP  
801 (FL-APP) was measured by western blot using A8717 primary antibody in the hippocampus  
802 at 3-months of age in female and male mice. No difference in, or **(A)** α-CTF ( $F(1,10) = 0.019$ ,  
803  $p = 0.892$ ) **(B)** β-CTF ( $F(1,11) = 1.493$ ,  $p = 0.247$ ) **(C)** FL-APP ( $F(1,11) = 1.305$ ,  $p = 0.277$ )  
804 abundance between Dp(16)3Tyb;tgAPP (n = 12, male = 8 and female = 4) and tgAPP (n = 12,

805 male = 8 and female = 4) littermate controls. Error bars show SEM, data points are  
806 independent mice.

807

808

809 **Fig. S3**

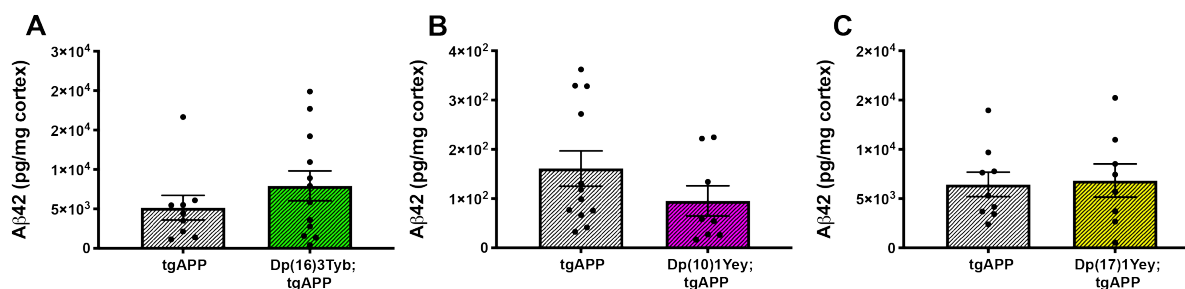

810

811 **Fig. S3 An additional copy of Hsa-21 homologues from the Dp(16)3Tyb, Dp(10)1Yey, or**  
812 **Dp(17)1Yey regions did not alter the abundance of insoluble amyloid- $\beta_{42}$  in cortex at 6-**  
813 **months of age.**

814 **(A)** In Dp(16)3Tyb;tgAPP mice (n = 12, 7 male and 5 female) insoluble amyloid- $\beta_{42}$  abundance  
815 (F(1,16) = 1.851 p = 0.192) did not significantly differ from tgAPP (n = 10, 3 male and 7  
816 female) littermates at 6-months of age.

817 **(B)** In Dp(10)1Yey;tgAPP (n = 8, 3 male and 5 female) mice insoluble amyloid- $\beta_{42}$  abundance  
818 (F(1,14) = 2.990 p = 0.106) did not significantly differ from tgAPP (n = 12, 7 male and 5  
819 female) littermates at 6-months of age.

820 **(C)** In Dp(17)1Yey;tgAPP (n = 8, 4 male and 4 female) mice insoluble amyloid- $\beta_{42}$  abundance  
821 (F(1,11) = 0.299 p = 0.596) did not significantly differ from tgAPP (n = 9, 4 male and 5  
822 female) littermates at 6-months of age.

823 Error bars show SEM, data points are independent mice.

824

825

826

827 Fig. S4

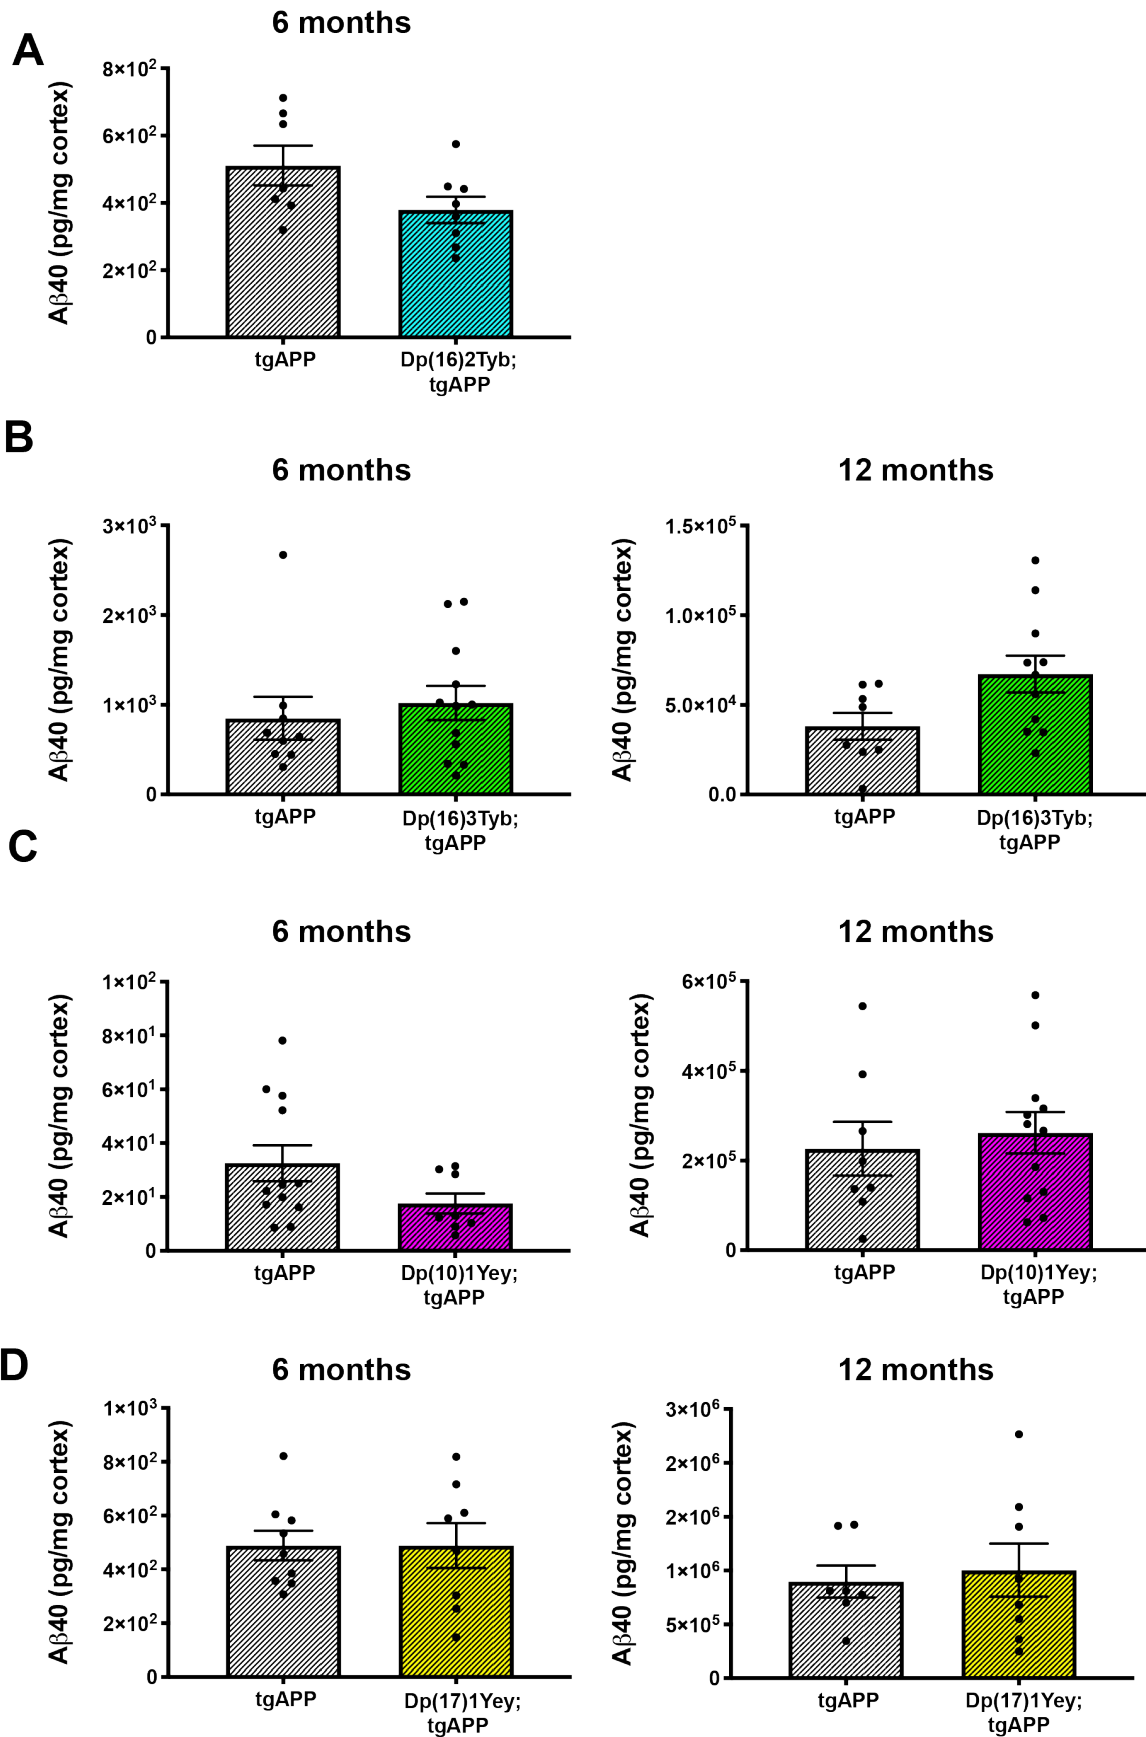

828



829 **Fig. S4 An additional copy of Hsa-21 homologues from the Dp(16)2Tyb, Dp(16)3Tyb,**  
830 **Dp(10)1Yey, or Dp(17)1Yey regions did not alter the abundance of insoluble amyloid-**  
831  **$\beta_{40}$  in cortex at 6- or 12- months of age.**

832 **(A)** In Dp(16)2Tyb;tgAPP (n = 8, 3 male and 5 female) mice insoluble amyloid- $\beta_{40}$  abundance  
833 (F(1,9) = 0.3.739 p = 0.085) did not significantly differ from tgAPP (n = 7, 2 male and 5  
834 female) littermates at 6-months of age.

835 **(B)** In Dp(16)3Tyb;tgAPP (n = 12, 7 male and 5 female) mice insoluble amyloid- $\beta_{40}$  abundance  
836 (F(1,16) = 0.654 p = 0.431) did not significantly differ from tgAPP (n = 10, 3 male and 7  
837 female) littermates at 6-months of age. In Dp(16)3Tyb;tgAPP mice (n = 11, 7 male and 4  
838 female) insoluble amyloid- $\beta_{40}$  abundance (F(1,13) = 2.776, p = 0.120) did not significantly  
839 differ from tgAPP (n = 8, 5 male and 3 female) littermates at 12-months of age .

840 **(C)** In Dp(10)1Yey;tgAPP (n = 8, 3 male and 5 female) mice insoluble amyloid- $\beta_{40}$  abundance  
841 (F(1,14) = 3.417 p = 0.086) did not significantly differ from tgAPP (n = 12, 7 male and 5  
842 female) littermates at 6-months of age. In Dp(10)1Yey;tgAPP (n = 12, 6 male and 6 female)  
843 mice insoluble amyloid- $\beta_{40}$  abundance (F(1,14) = 1.112, p = 0.307) did not significantly  
844 differ from tgAPP (n = 8, 5 male and 3 female) littermates at 12-months of age.

845 **(D)** In Dp(17)1Yey;tgAPP (n = 8, 4 male and 4 female) mice insoluble amyloid- $\beta_{40}$  abundance  
846 (F(1,11) = 0.498, p = 0.495) did not significantly differ from tgAPP (n = 9, 4 male and 5  
847 female) littermates at 6-months of age. In Dp(17)1Yey;tgAPP (n = 8, 3 male and 5 female)  
848 mice insoluble amyloid- $\beta_{40}$  abundance (F(1,9) = 0.645, p = 0.443) did not significantly differ  
849 from tgAPP (n = 7, 4 male and 3 female) littermates at 12-months of age.

850 Error bars show SEM, data points are independent mice.

851

852

853

854

855

856 **Fig. S5**

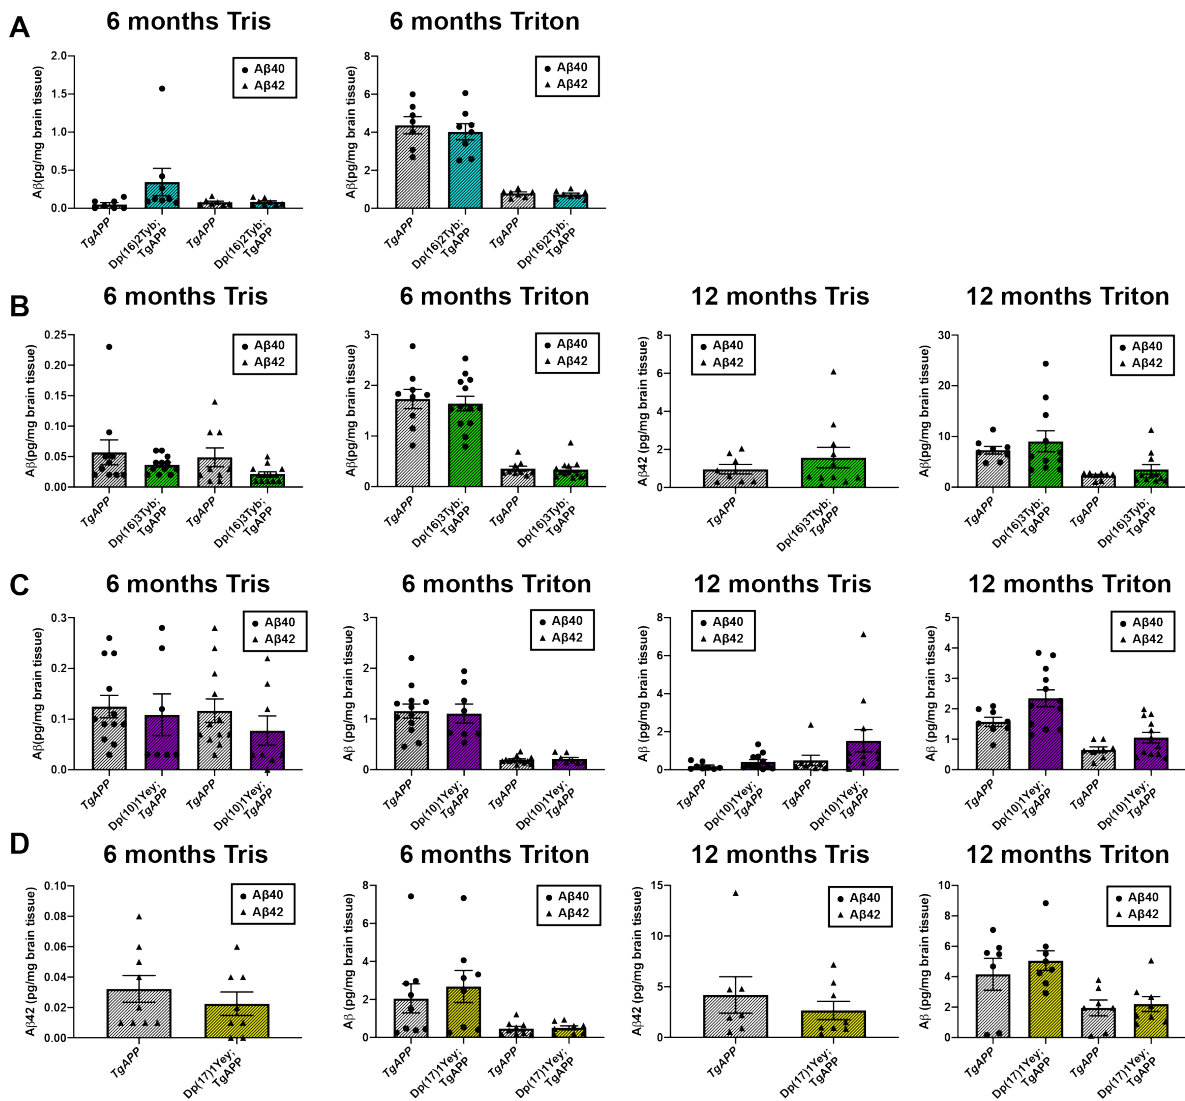

857

858 **Fig. S5 The effect of an additional copy of Hsa-21 homologues from the Dp(16)2Tyb,**  
 859 **Dp(16)3Tyb, Dp(10)1Yey, or Dp(17)1Yey regions on soluble Tris and Triton amyloid- $\beta_{40}$**   
 860 **and amyloid- $\beta_{42}$  in the cortex at 6- or 12- months of age.**

861 **(A)** In Dp(16)2Tyb;tgAPP mice in the soluble Tris fraction, amyloid- $\beta_{40}$  abundance ( $F(1,9) =$   
 862  $1.131, p = 0.315$ ) and amyloid- $\beta_{42}$  abundance ( $F(1,9) = 0.261, p = 0.622$ ) did not  
 863 significantly differ from tgAPP littermates at 6-months of age. In Dp(16)2Tyb;tgAPP mice  
 864 in the soluble Triton fraction, amyloid- $\beta_{40}$  abundance ( $F(1,9) = 0.08, p = 0.784$ ) and  
 865 amyloid- $\beta_{42}$  abundance ( $F(1,9) = 0.224, p = 0.647$ ) did not significantly differ from tgAPP  
 866 littermates at 6-months of age. Dp(16)2Tyb;tgAPP ( $n = 8, 3$  male and 5 female) tgAPP ( $n$   
 867  $= 7, 2$  male and 5 female).

868 **(B)** In Dp(16)3Tyb;tgAPP mice in the soluble Tris fraction, amyloid- $\beta_{40}$  abundance ( $F(1,16) =$   
 869  $0.789, p = 0.387$ ) and amyloid- $\beta_{42}$  abundance ( $U(N_{Dp(16)3Tyb;tgAPP} = 12, N_{tgAPP} = 10,) = 44, p$   
 870  $= 0.341$ ) did not significantly differ from tgAPP littermates at 6-months of age. In  
 871 Dp(16)3Tyb;tgAPP mice in the soluble Triton fraction, amyloid- $\beta_{40}$  abundance ( $F(1,16) =$

872 0.006,  $p = 0.940$ ) and amyloid- $\beta_{42}$  abundance ( $F(1,16) = 0.006$ ,  $p = 0.844$ ) did not  
873 significantly differ from tgAPP littermates at 6-months of age Dp(16)3Tyb;tgAPP ( $n = 12$ ,  
874 7 male and 5 female) tgAPP ( $n = 10$ , 3 male and 7 female). In Dp(16)3Tyb;tgAPP mice in  
875 the soluble Tris fraction, amyloid- $\beta_{42}$  abundance ( $F(1,13) = 0.332$ ,  $p = 0.574$ ) did not  
876 significantly differ from tgAPP littermates at 12-months of age. Amyloid- $\beta_{40}$  was below the  
877 limit of detection. In Dp(16)3Tyb;tgAPP mice in the soluble Triton fraction, amyloid- $\beta_{40}$   
878 abundance ( $F(1,13) = 0.044$ ,  $p = 0.837$ ) and amyloid- $\beta_{42}$  abundance ( $F(1,13) = 0.352$ ,  $p =$   
879  $0.563$ ) did not significantly differ from tgAPP littermates at 12-months of age.  
880 Dp(16)3Tyb;tgAPP mice ( $n = 11$ , 7 male and 4 female) tgAPP ( $n = 8$ , 5 male and 3 female).  
881 **(C)** In Dp(10)1Yey;tgAPP mice in the soluble Tris fraction, amyloid- $\beta_{40}$  abundance ( $F(1,14) =$   
882  $0.0003$ ,  $p = 0.986$ ) and amyloid- $\beta_{42}$  abundance ( $F(1,14) = 0.256$ ,  $p = 0.621$ ) did not  
883 significantly differ from tgAPP littermates at 6-months of age. In Dp(10)1Yey;tgAPP mice  
884 in the soluble Triton fraction, amyloid- $\beta_{40}$  abundance ( $F(1,14) = 0.147$ ,  $p = 0.707$ ) and  
885 amyloid- $\beta_{42}$  abundance ( $F(1,14) = 0.559$ ,  $p = 0.467$ ) did not significantly differ from tgAPP  
886 littermates at 6-months of age. Dp(10)1Yey;tgAPP ( $n = 8$ , 3 male and 5 female) tgAPP ( $n$   
887  $= 12$ , 7 male and 5 female). In Dp(10)1Yey;tgAPP mice in the soluble Tris fraction,  
888 amyloid- $\beta_{40}$  abundance ( $F(1,14) = 1.784$ ,  $p = 0.203$ ) did not significantly differ from tgAPP  
889 littermates at 12-months of age however median amyloid- $\beta_{42}$  was significantly increased  
890 ( $U(N_{Dp(10)1Yey;tgAPP} = 12, N_{tgAPP} = 8,) = 21$ ,  $p = 0.039$ ). In Dp(10)1Yey;tgAPP mice in the  
891 soluble Triton fraction, amyloid- $\beta_{40}$  abundance ( $F(1,14) = 2.715$ ,  $p = 0.122$ ) and median  
892 amyloid- $\beta_{42}$  ( $U(N_{Dp(10)1Yey;tgAPP} = 12, N_{tgAPP} = 8,) = 33$ ,  $p = 270$ ) did not significantly differ  
893 from tgAPP littermates at 12-months of age. Dp(10)1Yey;tgAPP ( $n = 12$ , 6 male and 6  
894 female) tgAPP ( $n = 8$ , 5 male and 3 female).  
895 **(D)** In Dp(17)1Yey;tgAPP mice in the soluble Tris fraction, amyloid- $\beta_{42}$  abundance ( $F(1,11) =$   
896  $0.237$   $p = 0.636$ ) did not significantly differ from tgAPP littermates at 6-months of age.  
897 Amyloid- $\beta_{40}$  was below the limit of detection. Dp(17)1Yey;tgAPP ( $n = 8$ , 4 male and 4  
898 female) tgAPP ( $n = 9$ , 4 male and 5 female). In Dp(17)1Yey;tgAPP mice in the soluble  
899 Triton fraction, amyloid- $\beta_{40}$  abundance ( $F(1,11) = 0.490$ ,  $p = 0.499$ ) and amyloid- $\beta_{42}$   
900 abundance ( $F(1,11) = 0.067$ ,  $p = 0.800$ ) did not significantly differ from tgAPP littermates  
901 at 6-months of age. In Dp(17)1Yey;tgAPP mice in the soluble Tris fraction, amyloid- $\beta_{42}$   
902 abundance ( $F(1,9) = 0.215$   $p = 0.654$ ) did not significantly differ from tgAPP littermates at  
903 12-months of age. Amyloid- $\beta_{40}$  was below the limit of detection. In Dp(17)1Yey;tgAPP mice  
904 in the soluble Triton fraction, amyloid- $\beta_{40}$  abundance ( $F(1,9) 0.58$ ,  $p = 0.466$ ) and amyloid-  
905  $\beta_{42}$  abundance ( $F(1,9) = 0.294$ ,  $p = 0.601$ ) did not significantly differ from tgAPP littermates  
906 at 12-months of age. Dp(17)1Yey;tgAPP ( $n = 8$ , 3 male and 5 female) tgAPP ( $n = 7$ , 4  
907 male and 3 female). Error bars show SEM, data points are independent mice.  
908

909 **Fig. S6**

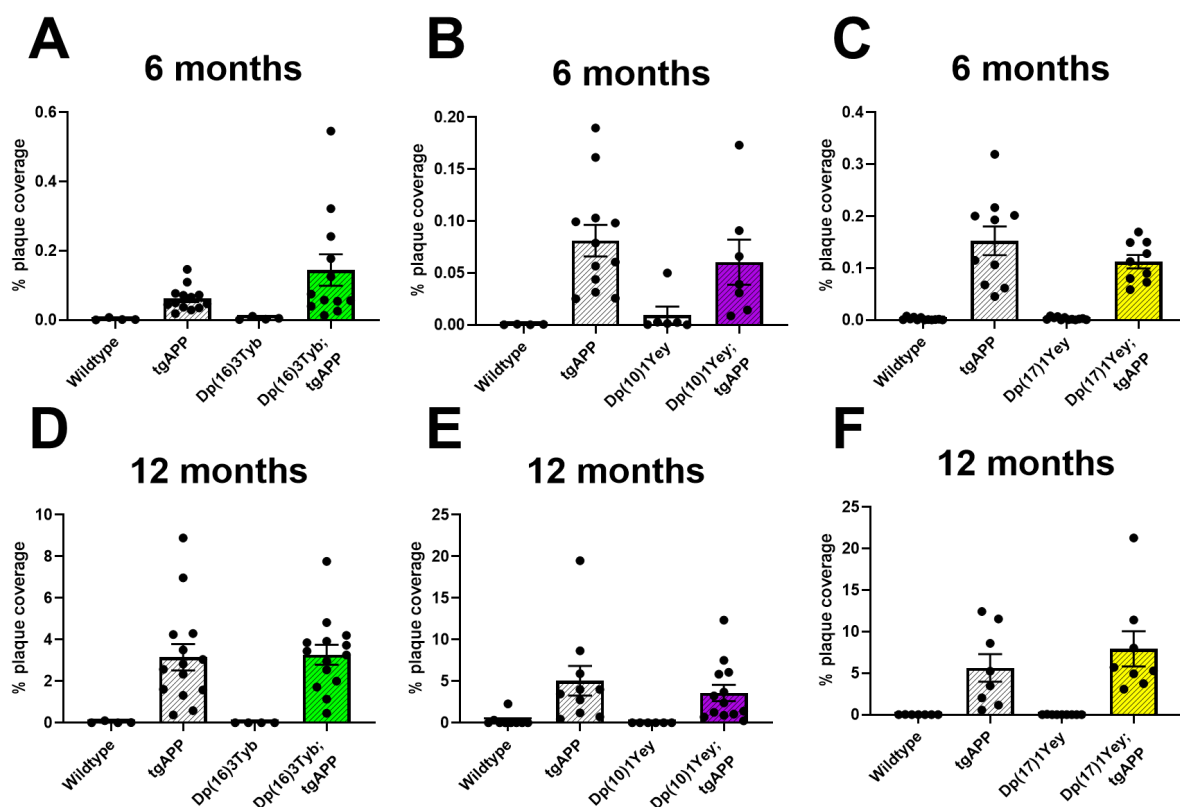

910  
911 **Fig. S6 Deposition of amyloid- $\beta$  in the cortex at 6- and 12-months of age in the**  
912 **Dp(16)3Tyb, Dp(10)1Yey or Dp(17)1Yey tgAPP double mutants.**

913 Amyloid- $\beta$  deposition in the cortex was quantified at (A-C) 6- and (D-F) 12-months of age in  
914 male and female mice, percentage of the region covered by stain was calculated. Error  
915 bars show SEM, data points are independent mice.

916 **(A)** No significant difference in amyloid- $\beta$  deposition in the cortex was detected at 6-months of  
917 age in Dp(16)3Tyb;tgAPP compared with tgAPP controls ( $U(N_{\text{Dp}(16)3\text{Tyb};\text{tgAPP}} = 12, N_{\text{tgAPP}} =$   
918  $13, ) = 56, p = 0.247$ ). After systematic outlier testing one tgAPP sample was excluded prior  
919 to analysis. Dp(16)3Tyb;tgAPP female n=6, male n=6; tgAPP female n=7, male n=6.

920 **(B)** No significant difference in amyloid- $\beta$  deposition in the cortex was detected at 6-months of  
921 age in Dp(10)1Yey;tgAPP compared with tgAPP controls ( $F(1,14) = 0.246, p = 0.628$ ).  
922 Dp(10)1Yey;tgAPP female n=4, male n=3; tgAPP female n=5, male n=7.

923 **(C)** No significant difference in amyloid- $\beta$  deposition in the cortex was detected at 6-months of  
924 age in Dp(17)1Yey;tgAPP compared with tgAPP controls ( $U(N_{\text{Dp}(17)1\text{Yey};\text{tgAPP}} = 9, N_{\text{tgAPP}} =$   
925  $10, ) = 34, p = 0.400$ ). Dp(17)1Yey;tgAPP female n=5, male n=4; tgAPP female n=6, male  
926 n=4.

927 **(D)** No significant difference in amyloid- $\beta$  deposition in the cortex was detected at 12-months  
928 of age in Dp(16)3Tyb;tgAPP compared with tgAPP controls ( $F(1,23) = 0.031$ ,  $p = 0.861$ ).  
929 Dp(16)3Tyb;tgAPP female  $n=8$ , male  $n=6$ ; tgAPP female  $n=7$ , male  $n=7$ .

930 **(E)** No significant difference in amyloid- $\beta$  deposition in the cortex was detected at 12-months  
931 of age in Dp(10)1Yey;tgAPP compared with tgAPP controls ( $F(1,18) = 0.056$ ,  $p = 0.815$ ).  
932 Dp(10)1Yey;tgAPP female  $n=7$ , male  $n=6$ ; tgAPP female  $n=6$ , male  $n=4$ .

933 **(F)** No significant difference in amyloid- $\beta$  deposition in the cortex was detected at 12-months  
934 of age in Dp(17)1Yey;tgAPP compared with tgAPP controls ( $F(1,11) = 0.218$ ,  $p = 0.649$ ).  
935 Error bars show SEM, data points are independent mice. Dp(17)1Yey;tgAPP female  $n=5$ ,  
936 male  $n=3$ ; tgAPP female  $n=5$ , male  $n=3$ .

937  
938  
939  
940
